# Supplementary material
Source: PubMed Central journal article supplement (PMC3049937)
Supplement: NIHMS275240-supplement-SI.pdf [file NIHMS275240-supplement-SI.pdf]

## Supporting Information for

# Aerobic Oxidative Coupling of *o*-Xylene: Discovery of 2-Fluoropyridine as a Ligand to Support Selective Pd-Catalyzed C–H Functionalization

Yusuke Izawa and Shannon S. Stahl\*

*Department of Chemistry, University of Wisconsin-Madison,  
1101 University Avenue, Madison, WI, 53706  
stahl@chem.wisc.edu*

| <b><i>Table of Contents</i></b>                                                                            | <b><i>Page</i></b> |
|------------------------------------------------------------------------------------------------------------|--------------------|
| <i>Additional Reaction Optimization Table</i>                                                              | <i>S2-S4</i>       |
| <i>NMR Spectroscopic Studies : Pd(OAc)<sub>2</sub> and 2-fluoropyridine</i>                                | <i>S5</i>          |
| <i>NMR Spectroscopic Studies : Pd(TFA)<sub>2</sub> and 2-fluoropyridine</i>                                | <i>S6</i>          |
| <i>NMR Spectroscopic Studies : Pd(OAc)<sub>2</sub>, CF<sub>3</sub>CO<sub>2</sub>H and 2-fluoropyridine</i> | <i>S7</i>          |
| <i>NMR Spectroscopic Studies : Pd(OAc)<sub>2</sub>, Pd(TFA)<sub>2</sub> and 2-fluoropyridine</i>           | <i>S8</i>          |
| <i>NMR Spectroscopic Studies : Pd(TFA)<sub>2</sub> and multifluoropyridine</i>                             | <i>S9-S11</i>      |
| <i>General Considerations</i>                                                                              | <i>S12</i>         |
| <i>Representative Procedure for Aerobic Oxidative Coupling of <i>o</i>-Xylene</i>                          | <i>S12-S13</i>     |
| <i>Initial Reaction Rates</i>                                                                              | <i>S13</i>         |
| <i>Synthesis of trans-Pd(<sup>2</sup>Fpy)<sub>2</sub>(TFA)<sub>2</sub></i>                                 | <i>S13</i>         |
| <i><sup>1</sup>H NMR Spectrum of trans-Pd(<sup>2</sup>Fpy)<sub>2</sub>(TFA)<sub>2</sub></i>                | <i>S14</i>         |
| <i><sup>19</sup>F NMR Spectrum of trans-Pd(<sup>2</sup>Fpy)<sub>2</sub>(TFA)<sub>2</sub></i>               | <i>S15</i>         |
| <i>Crystallographic Characterization</i>                                                                   | <i>S16-S30</i>     |

**Table S1.** Additional Reaction Optimization Data.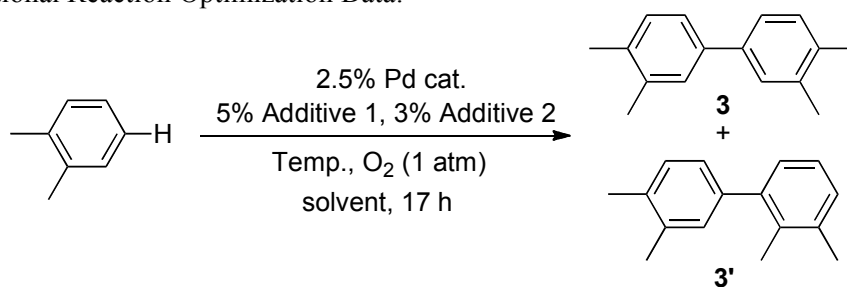

| Entry | Catalyst (2.5%)            | Additive 1 <sup>a</sup>     | Additive 2                        | Solvent <sup>b</sup> | Temp °C   | % yield (3+3') <sup>c</sup> | % Regioselectivity( <b>3</b> ) |
|-------|----------------------------|-----------------------------|-----------------------------------|----------------------|-----------|-----------------------------|--------------------------------|
| 1     | Pd(OAc) <sub>2</sub>       | --                          | CF <sub>3</sub> CO <sub>2</sub> H | --                   | 80        | 2.5                         | 67                             |
| 2     | Pd(TFA) <sub>2</sub>       | --                          | --                                | --                   | 80        | 2.8                         | 68                             |
| 3     | Pd(OAc) <sub>2</sub>       | --                          | CF <sub>3</sub> CO <sub>2</sub> H | p.c.                 | 80        | 11.1                        | 67                             |
| 4     | Pd(OAc) <sub>2</sub>       | Py                          | CF <sub>3</sub> CO <sub>2</sub> H | p.c.                 | 80        | 0.2                         | 90                             |
| 5     | Pd(OAc) <sub>2</sub>       | 2-OMe-py                    | CF <sub>3</sub> CO <sub>2</sub> H | p.c.                 | 80        | 0.5                         | 68                             |
| 6     | Pd(OAc) <sub>2</sub>       | 2-OEt-py                    | CF <sub>3</sub> CO <sub>2</sub> H | p.c.                 | 80        | 1.2                         | 75                             |
| 7     | Pd(OAc) <sub>2</sub>       | 2-OH-py                     | CF <sub>3</sub> CO <sub>2</sub> H | p.c.                 | 80        | 1.8                         | 70                             |
| 8     | Pd(OAc) <sub>2</sub>       | 2-Me-py                     | CF <sub>3</sub> CO <sub>2</sub> H | p.c.                 | 80        | 2.3                         | 75                             |
| 9     | <b>Pd(OAc)<sub>2</sub></b> | <b>2-F-py</b>               | CF <sub>3</sub> CO <sub>2</sub> H | <b>p.c.</b>          | <b>80</b> | <b>27.4</b>                 | <b>88</b>                      |
| 10    | Pd(OAc) <sub>2</sub>       | 2-Cl-py                     | CF <sub>3</sub> CO <sub>2</sub> H | p.c.                 | 80        | 5.6                         | 83                             |
| 11    | Pd(OAc) <sub>2</sub>       | 2-CF <sub>3</sub> -py       | CF <sub>3</sub> CO <sub>2</sub> H | p.c.                 | 80        | 10.2                        | 65                             |
| 12    | Pd(OAc) <sub>2</sub>       | 3-F-py                      | CF <sub>3</sub> CO <sub>2</sub> H | p.c.                 | 80        | 3.2                         | 90                             |
| 13    | Pd(OAc) <sub>2</sub>       | 4-F-py                      | CF <sub>3</sub> CO <sub>2</sub> H | p.c.                 | 80        | 7.7                         | 86                             |
| 14    | Pd(OAc) <sub>2</sub>       | 2,3,5-trifluoro-py          | CF <sub>3</sub> CO <sub>2</sub> H | p.c.                 | 80        | 16.3                        | 68                             |
| 15    | Pd(OAc) <sub>2</sub>       | 2,4,6-trifluoro-py          | CF <sub>3</sub> CO <sub>2</sub> H | p.c.                 | 80        | 21.9                        | 58                             |
| 16    | Pd(OAc) <sub>2</sub>       | 2-F,4-CF <sub>3</sub> -py   | CF <sub>3</sub> CO <sub>2</sub> H | p.c.                 | 80        | 16.6                        | 77                             |
| 17    | Pd(OAc) <sub>2</sub>       | 2-F,6-CO <sub>2</sub> Me-py | CF <sub>3</sub> CO <sub>2</sub> H | p.c.                 | 80        | 19.2                        | 71                             |
| 18    | Pd(OAc) <sub>2</sub>       | 2,6-Di- <sup>t</sup> Bu-py  | CF <sub>3</sub> CO <sub>2</sub> H | p.c.                 | 80        | 21.9                        | 74                             |
| 19    | Pd(OAc) <sub>2</sub>       | Pyrazine                    | CF <sub>3</sub> CO <sub>2</sub> H | p.c.                 | 80        | 1.3                         | 92                             |
| 20    | Pd(OAc) <sub>2</sub>       | Pyridazine                  | CF <sub>3</sub> CO <sub>2</sub> H | p.c.                 | 80        | 1.0                         | 83                             |
| 21    | Pd(OAc) <sub>2</sub>       | 2-NH <sub>2</sub> -py       | CF <sub>3</sub> CO <sub>2</sub> H | p.c.                 | 80        | 0.0                         | --                             |
| 22    | Pd(OAc) <sub>2</sub>       | 2-NMe <sub>2</sub> -py      | CF <sub>3</sub> CO <sub>2</sub> H | p.c.                 | 80        | 0.0                         | --                             |

|    |                                                      |                  |                                           |                     |    |                             |    |
|----|------------------------------------------------------|------------------|-------------------------------------------|---------------------|----|-----------------------------|----|
| 23 | Pd(OAc) <sub>2</sub>                                 | 2-PhNH-py        | CF <sub>3</sub> CO <sub>2</sub> H         | p.c.                | 80 | 0.0                         | -- |
| 24 | Pd(OAc) <sub>2</sub>                                 | bpy              | CF <sub>3</sub> CO <sub>2</sub> H         | p.c.                | 80 | 0.0                         | -- |
| 25 | Pd(OAc) <sub>2</sub>                                 | phen             | CF <sub>3</sub> CO <sub>2</sub> H         | p.c.                | 80 | 0.3                         | 90 |
| 26 | Pd(OAc) <sub>2</sub>                                 | en               | CF <sub>3</sub> CO <sub>2</sub> H         | p.c.                | 80 | 0.4                         | 76 |
| 27 | Pd(OAc) <sub>2</sub>                                 | TMEDA            | CF <sub>3</sub> CO <sub>2</sub> H         | p.c.                | 80 | 1.7                         | 71 |
| 28 | Pd(OAc) <sub>2</sub>                                 | 2-F-py<br>(2.5%) | CF <sub>3</sub> CO <sub>2</sub> H         | p.c.                | 80 | 33.9 <sup>e</sup>           | 84 |
| 29 | Pd(OAc) <sub>2</sub>                                 | 2-F-py<br>(3.8%) | CF <sub>3</sub> CO <sub>2</sub> H         | p.c.                | 80 | 29.6                        | 87 |
| 30 | Pd(OAc) <sub>2</sub>                                 | 2-F-py<br>(10%)  | CF <sub>3</sub> CO <sub>2</sub> H         | p.c.                | 80 | 25.4                        | 91 |
| 31 | Pd(OAc) <sub>2</sub>                                 | 2-F-py<br>(15%)  | CF <sub>3</sub> CO <sub>2</sub> H         | p.c.                | 80 | 19.0                        | 92 |
| 32 | Pd(OAc) <sub>2</sub>                                 | 2-F-py<br>(15%)  | CF <sub>3</sub> CO <sub>2</sub> H         | p.c.                | 80 | 19.0                        | 92 |
| 33 | Pd(OAc) <sub>2</sub>                                 | 2-F-py           | CF <sub>3</sub> CO <sub>2</sub> H<br>(1%) | p.c.                | 80 | 8.3                         | 79 |
| 34 | Pd(OAc) <sub>2</sub>                                 | 2-F-py           | CF <sub>3</sub> CO <sub>2</sub> H<br>(2%) | p.c.                | 80 | 19.6                        | 85 |
| 35 | Pd(OAc) <sub>2</sub>                                 | 2-F-py           | CF <sub>3</sub> CO <sub>2</sub> H<br>(4%) | p.c.                | 80 | 21.2                        | 87 |
| 36 | Pd(OAc) <sub>2</sub>                                 | 2-F-py           | CF <sub>3</sub> CO <sub>2</sub> H<br>(8%) | p.c.                | 80 | 12.7                        | 72 |
| 37 | Pd(OAc) <sub>2</sub>                                 | 2-F-py           | --                                        | p.c.                | 80 | 5.1                         | 65 |
| 38 | Pd(OAc) <sub>2</sub> +<br>Pd(TFA) <sub>2</sub> (8:2) | 2-F-py           | --                                        | p.c.                | 80 | 8.5                         | 74 |
| 39 | Pd(OAc) <sub>2</sub> +<br>Pd(TFA) <sub>2</sub> (5:5) | 2-F-py           | --                                        | p.c.                | 80 | 20.4                        | 82 |
| 40 | Pd(OAc) <sub>2</sub> +<br>Pd(TFA) <sub>2</sub> (2:8) | 2-F-py           | --                                        | p.c.                | 80 | 22.4                        | 81 |
| 41 | Pd(TFA) <sub>2</sub>                                 | 2-F-py           | --                                        | p.c.                | 80 | 17.7                        | 78 |
| 42 | Pd(OAc) <sub>2</sub>                                 | 2-F-py           | CF <sub>3</sub> CO <sub>2</sub> H         | p.c.                | 60 | 13.1<br>(18.7) <sup>d</sup> | 89 |
| 43 | Pd(OAc) <sub>2</sub>                                 | 2-F-py           | CF <sub>3</sub> CO <sub>2</sub> H         | DMA                 | 80 | 11.0                        | 72 |
| 44 | Pd(OAc) <sub>2</sub>                                 | 2-F-py           | CF <sub>3</sub> CO <sub>2</sub> H         | DMF                 | 80 | 9.9                         | 70 |
| 45 | Pd(OAc) <sub>2</sub>                                 | 2-F-py           | CF <sub>3</sub> CO <sub>2</sub> H         | NMP                 | 80 | 10.0                        | 87 |
| 46 | Pd(OAc) <sub>2</sub>                                 | 2-F-py           | CF <sub>3</sub> CO <sub>2</sub> H         | DMSO                | 80 | 1.1                         | 60 |
| 47 | Pd(OAc) <sub>2</sub>                                 | 2-F-py           | CF <sub>3</sub> CO <sub>2</sub> H         | AcOH                | 80 | 18.1                        | 72 |
| 48 | Pd(OAc) <sub>2</sub>                                 | 2-F-py           | CF <sub>3</sub> CO <sub>2</sub> H         | EtCO <sub>2</sub> H | 80 | 9.6                         | 87 |
| 49 | Pd(OAc) <sub>2</sub>                                 | 2-F-py           | CF <sub>3</sub> CO <sub>2</sub> H         | PivOH               | 80 | 2.8                         | 85 |
| 50 | Pd(OAc) <sub>2</sub>                                 | 2-F-py           | CF <sub>3</sub> CO <sub>2</sub> H         | d.c.                | 80 | 10.9                        | 87 |
| 51 | Pd(OAc) <sub>2</sub>                                 | 2-F-py           | CF <sub>3</sub> CO <sub>2</sub> H         | --                  | 80 | 23.7                        | 82 |

|    |                      |        |                                                               |      |    |      |    |
|----|----------------------|--------|---------------------------------------------------------------|------|----|------|----|
| 52 | Pd(OAc) <sub>2</sub> | 2-F-py | CF <sub>3</sub> CO <sub>2</sub> H /<br>AlCl <sub>3</sub>      | p.c. | 80 | 0    | -- |
| 53 | Pd(OAc) <sub>2</sub> | 2-F-py | CF <sub>3</sub> CO <sub>2</sub> H /<br>Ag <sub>2</sub> O      | p.c. | 80 | 21.8 | 87 |
| 54 | Pd(OAc) <sub>2</sub> | 2-F-py | CF <sub>3</sub> CO <sub>2</sub> H /<br>AgNO <sub>3</sub> , KF | p.c. | 80 | 10.2 | 81 |
| 55 | Pd(OAc) <sub>2</sub> | 2-F-py | CF <sub>3</sub> CO <sub>2</sub> H /<br>Ti(TFA) <sub>3</sub>   | p.c. | 80 | 11.9 | 90 |
| 56 | Pd(OAc) <sub>2</sub> | 2-F-py | CF <sub>3</sub> CO <sub>2</sub> H /<br>LiF                    | p.c. | 80 | 26.4 | 87 |
| 57 | Pd(OAc) <sub>2</sub> | 2-F-py | CF <sub>3</sub> CO <sub>2</sub> H /<br>AgOTf                  | p.c. | 80 | 11.1 | 84 |

Conditions: **1** (3.8 mmole), 1 atm O<sub>2</sub>, solvent (0.4 mL), 17 hr., N/Pd = 2. <sup>a</sup>py = pyridine, bpy = 2,2'-dipyridyl, phen = 1,10-phenanthroline, en = ethylene diamine, TMEDA = tetramethyl ethylene diamine. <sup>b</sup>p.c. = propylene carbonate; DMA = *N,N*-dimethylacetamide; *N,N*-dimethylformamide; NMP = *N*-methylpyrrolidinone; PivOH = trimethylacetic acid; d.c. = diethyl carbonate. <sup>c</sup>Determined by GC, internal standard = n-hexadecane. <sup>d</sup>48 hr. <sup>e</sup>Although the highest yield was obtained under these conditions, the regioselectivity was decreased.

## NMR spectroscopic studies of Pd(OAc)<sub>2</sub> and 2-fluoropyridine in benzene-*d*<sub>6</sub>.

Pd(OAc)<sub>2</sub> (2.8 mg, 12.4 μmol) was added to an NMR tube together with benzene-*d*<sub>6</sub> (400 μL). Independently, a solution of 2-fluoropyridine (12.6 mg, 0.13 mmol) was prepared in benzene-*d*<sub>6</sub> (1.21 g, 107 mM). <sup>1</sup>H NMR spectra (300 MHz) and <sup>19</sup>F NMR spectra of a titration of 2-fluoropyridine against Pd(OAc)<sub>2</sub> at room temperature are shown in the stacked plots below. The assignments of 2-fluoropyridine ligand resonances are made on the basis of 2-fluoropyridine reagent in benzene-*d*<sub>6</sub>.

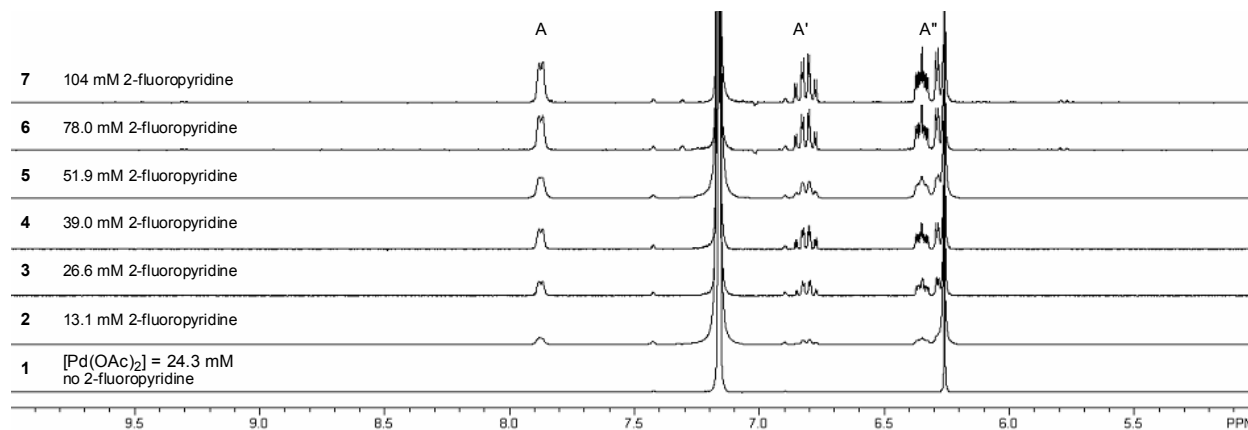

**Figure S1.** <sup>1</sup>H NMR spectra of a titration of 2-fluoropyridine against Pd(OAc)<sub>2</sub>. Conditions : [Pd(OAc)<sub>2</sub>] = 24.3 mM, [1,3,5-trimethoxybenzene] = 23.4 mM.

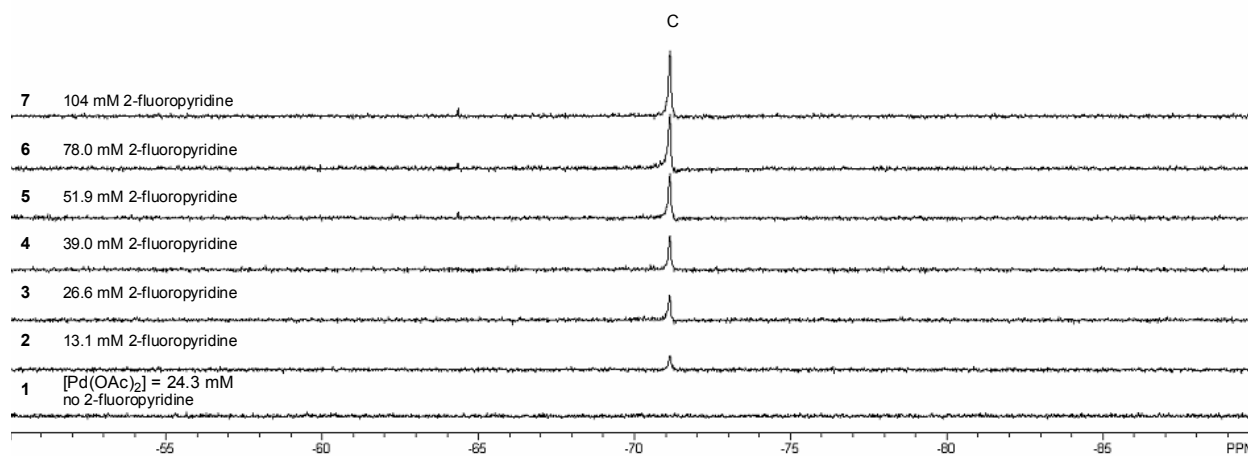

**Figure S2.** <sup>19</sup>F NMR spectra of a titration of 2-fluoropyridine against Pd(OAc)<sub>2</sub>. Conditions : [Pd(OAc)<sub>2</sub>] = 24.3 mM, [hexafluorobenzene] = 24.0 mM.

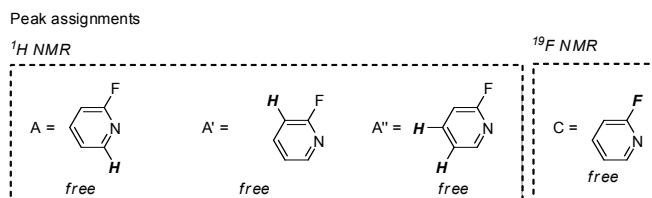

## NMR spectroscopic studies of Pd(TFA)<sub>2</sub> and 2-fluoropyridine in benzene-*d*<sub>6</sub>.

Pd(TFA)<sub>2</sub> (2.5 mg, 7.5 μmol) was added to an NMR tube together with benzene-*d*<sub>6</sub> (400 μL). Independently, a solution of 2-fluoropyridine (12.6 mg, 0.13 mmol) was prepared in benzene-*d*<sub>6</sub> (1.21 g, 107 mM). <sup>1</sup>H NMR spectra (300 MHz) and <sup>19</sup>F NMR spectra of a titration of 2-fluoropyridine against Pd(TFA)<sub>2</sub> at room temperature are shown in the stacked plots below. The assignments of 2-fluoropyridine ligand resonances are made on the basis of the <sup>1</sup>H and <sup>19</sup>F NMR spectra for the isolated Pd<sup>II</sup> complex, (F<sup>2</sup>py)<sub>2</sub>Pd(TFA)<sub>2</sub> (see X-ray crystal structure below) and free 2-fluoropyridine.

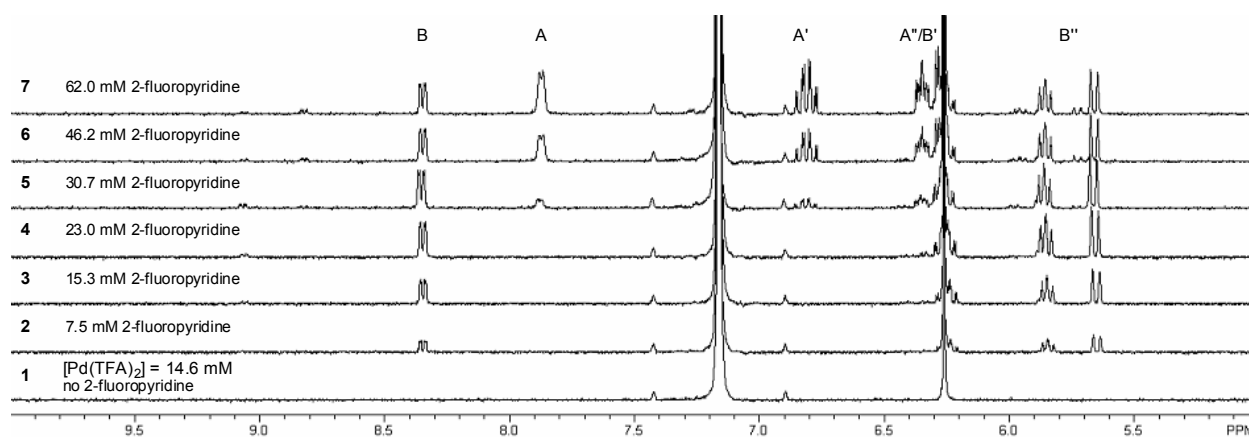

**Figure S3.** <sup>1</sup>H NMR spectra of a titration of 2-fluoropyridine against Pd(TFA)<sub>2</sub>. Conditions : [Pd(TFA)<sub>2</sub>] = 14.6 mM, [1,3,5-trimethoxybenzene] = 17.3 mM.

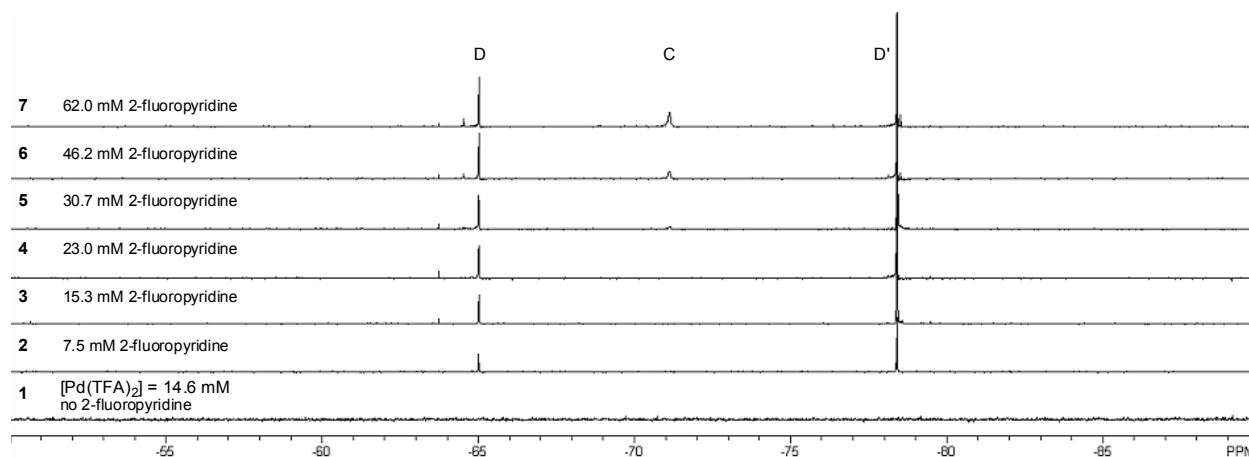

**Figure S4.** <sup>19</sup>F NMR spectra of a titration of 2-fluoropyridine against Pd(TFA)<sub>2</sub>. Conditions : [Pd(TFA)<sub>2</sub>] = 14.6 mM, [hexafluorobenzene] = 14.5 mM.

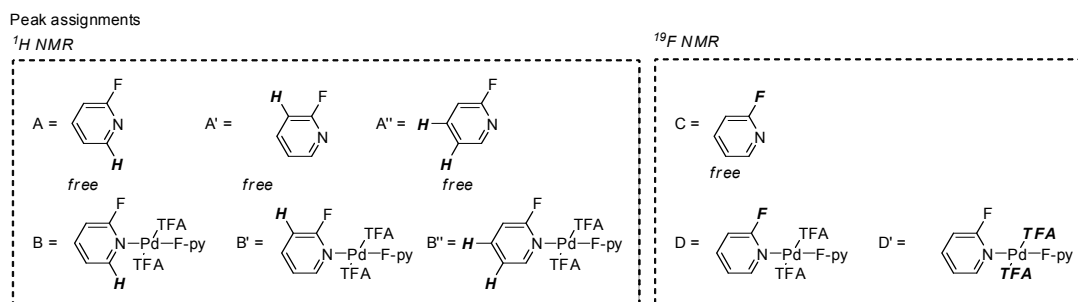

## NMR spectroscopic studies of Pd(OAc)<sub>2</sub>, 2-fluoropyridine and trifluoroacetic acid in benzene-*d*<sub>6</sub>.

Pd(OAc)<sub>2</sub> (2.4 mg, 10.7 μmol) was added to an NMR tube together with benzene-*d*<sub>6</sub> (400 μL). Independently, a solution of 2-fluoropyridine (12.6 mg, 0.13 μmol) and a solution of trifluoroacetic acid (26.5mg, 0.23 μmol) were prepared in benzene-*d*<sub>6</sub> (1.21 g, 107 mM and 0.79 g, 293 mM, respectively). <sup>1</sup>H NMR spectra (300 MHz) and <sup>19</sup>F NMR spectra of a titration of 2-fluoropyridine against Pd(TFA)<sub>2</sub> at room temperature are shown in the stacked plots below. The assignments of 2-fluoropyridine ligand resonances are made on the basis of the <sup>1</sup>H and <sup>19</sup>F NMR spectra for the isolated Pd<sup>II</sup> complex, (2<sup>F</sup>py)<sub>2</sub>Pd(TFA)<sub>2</sub> (see X-ray crystal structure below) and free 2-fluoropyridine.

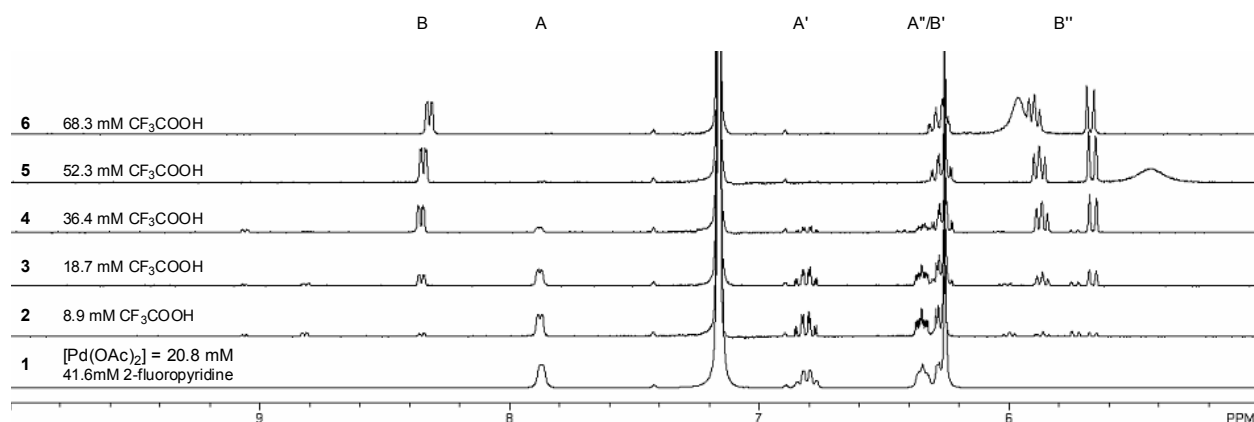

**Figure S5.** <sup>1</sup>H NMR spectra of a titration of trifluoroacetic acid against Pd(OAc)<sub>2</sub> and 2-fluoropyridine. Conditions : [Pd(OAc)<sub>2</sub>] = 20.8 mM, [1,3,5-trimethoxybenzene] = 19.8 mM.

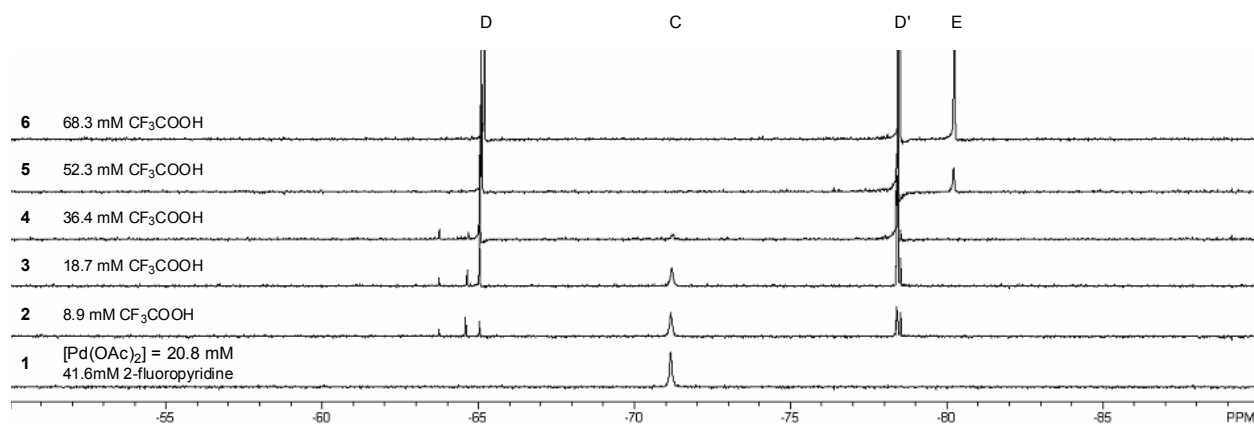

**Figure S6.** <sup>19</sup>F NMR spectra of a titration of trifluoroacetic acid against Pd(OAc)<sub>2</sub> and 2-fluoropyridine. Conditions : [Pd(OAc)<sub>2</sub>] = 20.8 mM, [hexafluorobenzene] = 19.8 mM.

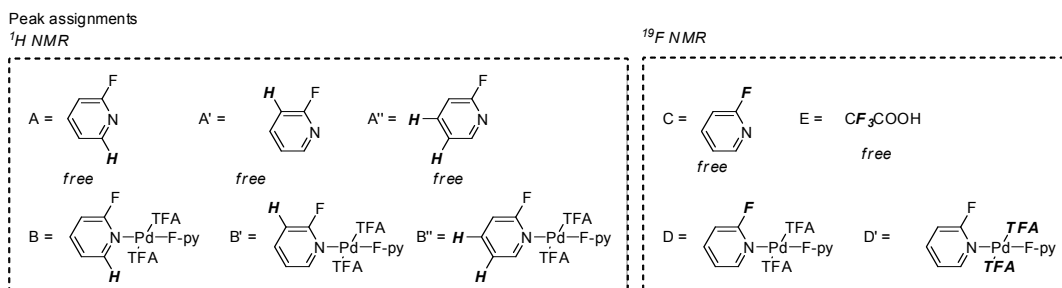

## NMR spectroscopic studies of Pd(OAc)<sub>2</sub>, Pd(TFA)<sub>2</sub> and 2-fluoropyridine in benzene-*d*<sub>6</sub>.

Pd(OAc)<sub>2</sub> (0.9 mg, 4.0 μmol) and Pd(TFA)<sub>2</sub> (1.4 mg, 4.2 μmol) were added to an NMR tube together with benzene-*d*<sub>6</sub> (400 μL). Independently, a solution of 2-fluoropyridine (12.5 mg, 0.13 μmol) and a solution of trifluoroacetic acid (26.5 mg, 0.23 μmol) were prepared in benzene-*d*<sub>6</sub> (0.62 g, 207 mM). After adding 2-fluoropyridine solution (194 mg, 21.0 mmol), trifluoroacetic acid was titrated into the mixture. <sup>1</sup>H NMR spectra (300 MHz) and <sup>19</sup>F NMR spectra of the titration at room temperature are shown in the stacked plots below. The assignments of 2-fluoropyridine ligand resonances are made on the basis of the <sup>1</sup>H and <sup>19</sup>F NMR spectra for the isolated Pd<sup>II</sup> complex, (2<sup>F</sup>py)<sub>2</sub>Pd(TFA)<sub>2</sub> (see X-ray crystal structure below) and free 2-fluoropyridine.

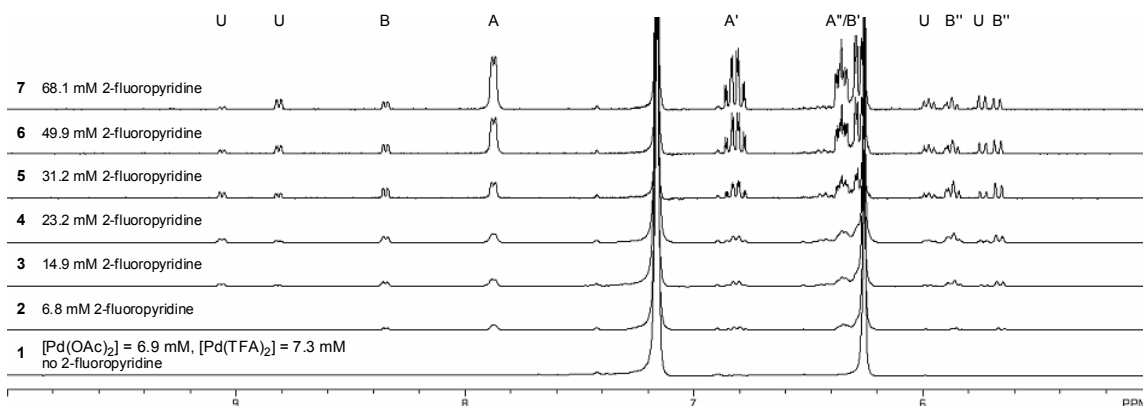

**Figure S7.** <sup>1</sup>H NMR spectra of a titration of 2-fluoropyridine against Pd(OAc)<sub>2</sub> and Pd(TFA)<sub>2</sub>. Conditions : [Pd(OAc)<sub>2</sub>] = 6.9 mM, [Pd(TFA)<sub>2</sub>] = 7.3 mM, [1,3,5-trimethoxybenzene] = 27.8 mM.

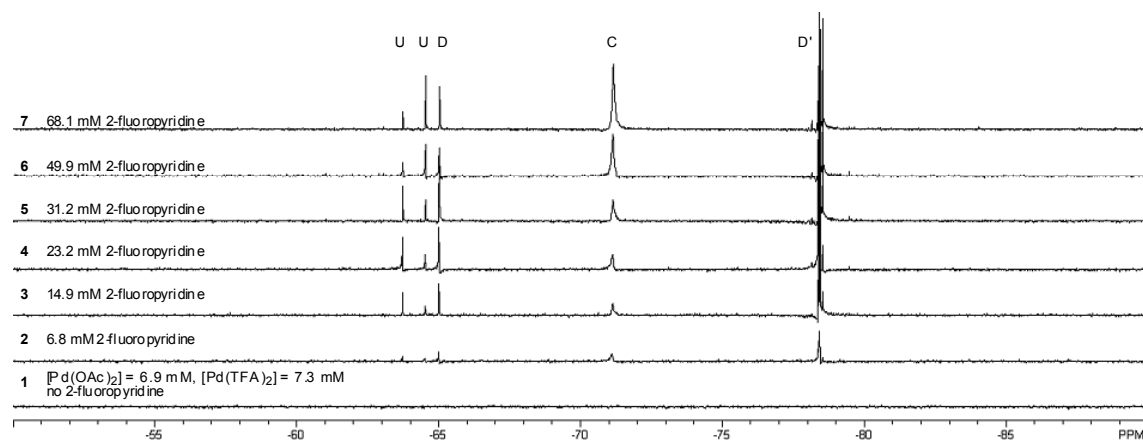

**Figure S8.** <sup>19</sup>F NMR spectra of a titration of 2-fluoropyridine against Pd(OAc)<sub>2</sub> and Pd(TFA)<sub>2</sub>. Conditions : [Pd(OAc)<sub>2</sub>] = 6.9 mM, [Pd(TFA)<sub>2</sub>] = 7.3 mM, [hexafluorobenzene] = 23.1 mM.

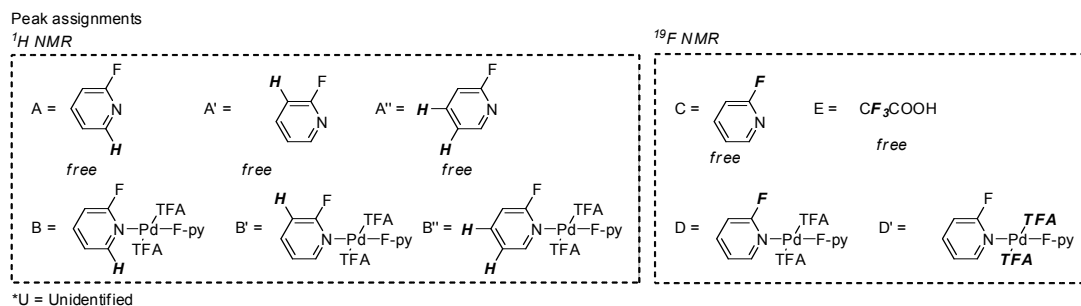



## NMR spectroscopic studies of Pd(TFA)<sub>2</sub> and 2,4,6-trifluoropyridine in benzene-*d*<sub>6</sub>.

Pd(TFA)<sub>2</sub> (2.4 mg, 7.2 μmol) was added to a NMR tube together with benzene-*d*<sub>6</sub> (400 μL). Independently, a solution of 2,4,6-trifluoropyridine (10.8 mg, 0.081 mmol) was prepared in benzene-*d*<sub>6</sub> (0.57 g, 140 mM). <sup>1</sup>H NMR spectra (300 MHz) and <sup>19</sup>F NMR spectra of a titration of 2,4,6-trifluoropyridine against Pd(TFA)<sub>2</sub> at room temperature are shown in the stacked plots below. The assignments of 2,4,6-trifluoropyridine ligand resonances are made on the basis of free 2,4,6-trifluoropyridine in benzene-*d*<sub>6</sub>.

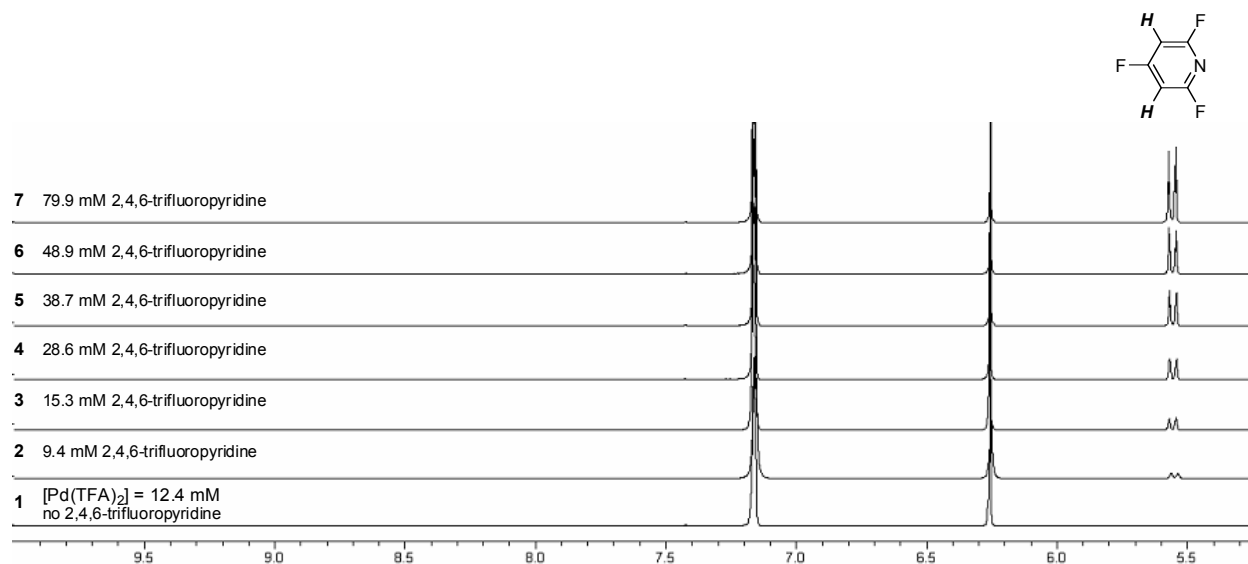

**Figure S9.** <sup>1</sup>H NMR spectra of a titration of 2,4,6-trifluoropyridine against Pd(TFA)<sub>2</sub>. Conditions : [Pd(TFA)<sub>2</sub>] = 12.4 mM, [1,3,5-trimethoxybenzene] = 24.3 mM.

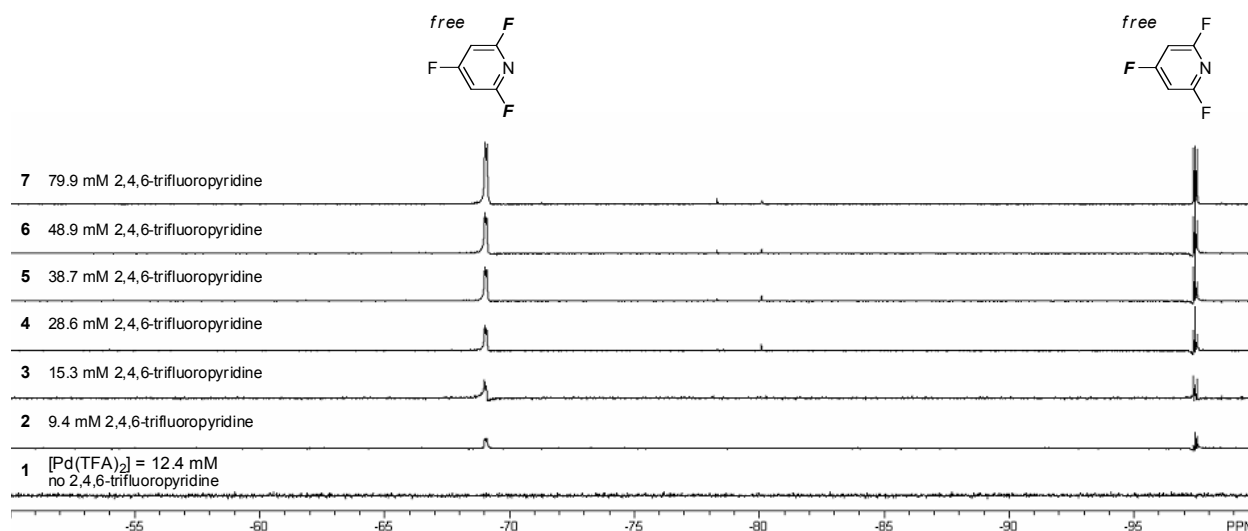

**Figure S10.** <sup>19</sup>F NMR spectra of a titration of 2,4,6-fluoropyridine against Pd(TFA)<sub>2</sub>. Conditions : [Pd(TFA)<sub>2</sub>] = 12.4 mM, [hexafluorobenzene] = 18.9 mM.

## NMR spectroscopic studies of Pd(TFA)<sub>2</sub> and 2,3,5-trifluoropyridine in benzene-*d*<sub>6</sub>.

Pd(TFA)<sub>2</sub> (3.8 mg, 11.4 μmol) was added to a NMR tube, followed by addition of benzene-*d*<sub>6</sub> (760 μL) and 2,3,5-trifluoropyridine (6.1 mg, 45.7 μmol). The assignments of 2,3,5-trifluoropyridine ligand resonances are made on the basis of 2,3,5-trifluoropyridine reagent in benzene-*d*<sub>6</sub>.

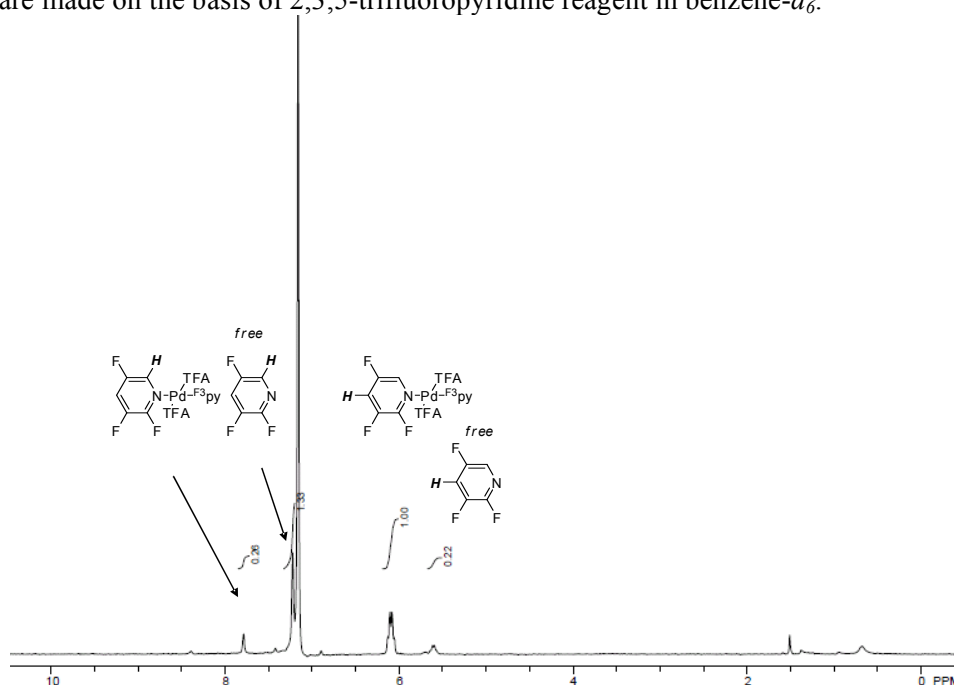

**Figure S11.** <sup>1</sup>H NMR spectra of a mixture of 2,3,5-trifluoropyridine and Pd(TFA)<sub>2</sub>. Conditions : [Pd(TFA)<sub>2</sub>] = 17.0 mM, 2,3,5-trifluoropyridine = 68.7 mM.

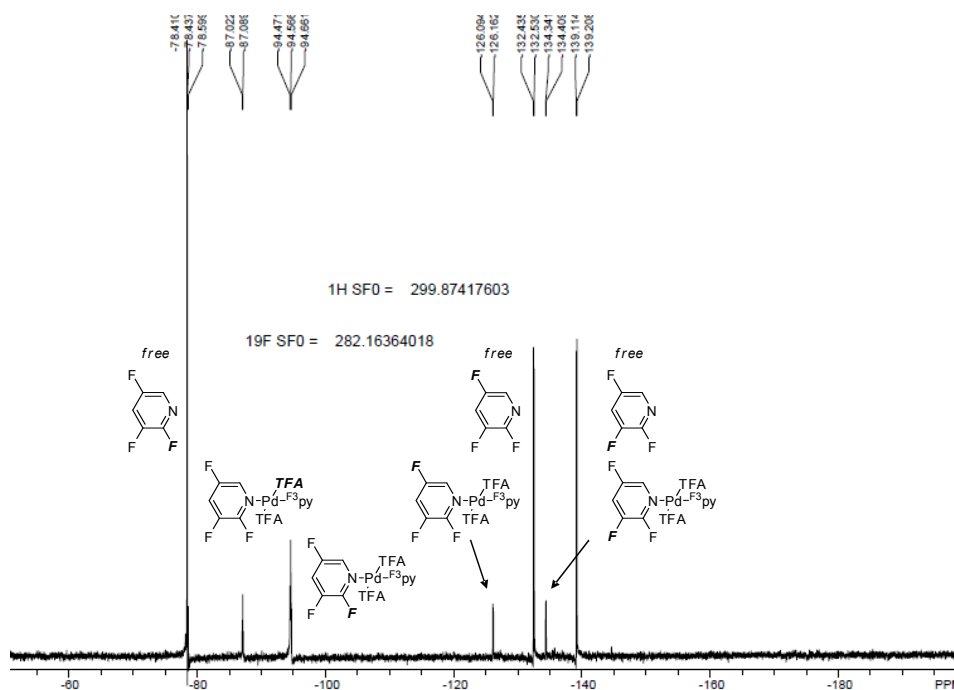

**Figure S12.** <sup>19</sup>F NMR spectra of a mixture of 2,3,5-trifluoropyridine and Pd(TFA)<sub>2</sub>. Conditions: [Pd(TFA)<sub>2</sub>] = 17.0 mM, 2,3,5-trifluoropyridine = 68.7 mM.

## NMR spectroscopic studies of Pd(TFA)<sub>2</sub> and pentafluoropyridine in benzene-*d*<sub>6</sub>.

Pd(TFA)<sub>2</sub> (2.5 mg, 7.5 μmol) was added to a NMR tube, together with benzene-*d*<sub>6</sub> (600 μL) and pentafluoropyridine (5.2 mg, 30.1 μmol). The assignments of pentafluoropyridine ligand resonances are made on the basis of pentafluoropyridine reagent in benzene-*d*<sub>6</sub>.

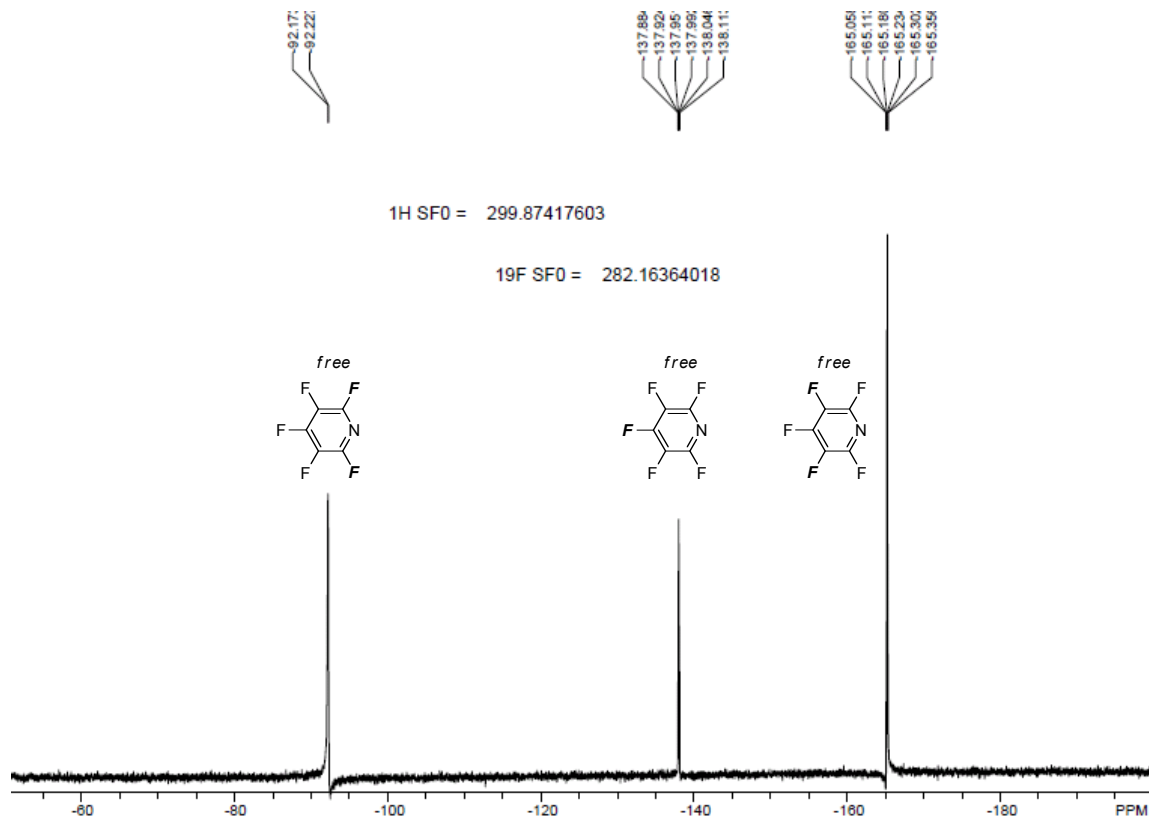

**Figure S13.** <sup>19</sup>F NMR spectra of a mixture of pentafluoropyridine and Pd(TFA)<sub>2</sub>. Conditions : [Pd(TFA)<sub>2</sub>] = 14.4 mM, pentafluoropyridine = 57.8 mM.

## Experimental.

### 1. General Considerations.

All commercially available compounds were purchased and used as received. Solvents were dried over alumina columns prior to use; however, purification and drying of commercial solvents is not required for the catalytic reactions described here.  $^1\text{H}$  and  $^{19}\text{F}$  NMR spectra were recorded on a Bruker AC-300MHz or Varian Mercury-300 MHz, and  $\text{CDCl}_3$  and benzene- $d_6$  were purchased from Aldrich. The chemical shift values were given in parts per million relative to internal TMS (0 ppm for  $^1\text{H}$ ), benzene (7.16 ppm), and  $^{19}\text{F}$  was referenced on TMS for  $^1\text{H}$  spectrum and reference parameters were transferred for the fluorine spectrum. Gas chromatographic analysis of reactions was conducted with a Shimadzu GC-17A gas chromatograph with either a DB-Wax or a RTX-5 column.

### 2. Representative Procedure for Aerobic Oxidative Coupling of *o*-Xylene.

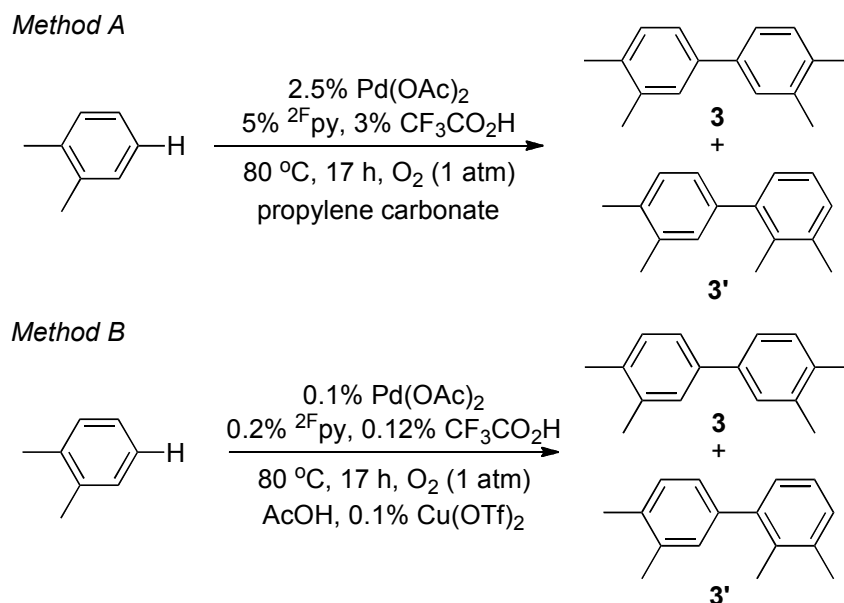

All of the catalytic aerobic oxidation reactions were performed using a custom reaction apparatus

#### *Method A:*

In a disposable culture tube, palladium complexes (0.094 mmol), 2-fluoropyridine (0.19 mmol), trifluoroacetic acid (0.113 mmol), *o*-xylene (0.4 g) and propylene carbonate (0.4 g) were combined. The reaction tubes were placed in a 48-well aluminum block mounted on a Large Capacity Mixer (Glas-Col) that enabled several reactions to be performed simultaneously under a constant pressure of (approx 1 atm) with controlled temperature and orbital agitation. The headspace above the tubes was purged with oxygen gas for ca. 5 min. The reactions were vortexed for 17 hr under 1 atm of O<sub>2</sub>. After the reactions were stopped, *n*-hexadecane was added to the reaction mixture as an internal standard. Samples were evaluated by GC for the products and remaining starting materials.

#### *Method B:*

In a 6 ml vial, palladium complexes (0.02 mmol), 2-fluoropyridine (0.04 mmol), trifluoroacetic acid (0.024 mmol) and acetic acid (2 g) were combined and stirred at room temperature for 30 min. The mixture was used as a stock solution. In a disposable culture tube, copper triflate (0.04 mmol) and *o*-xylene (0.4 g) were combined. Then, the stock solution (0.4 g) was added. Reaction tubes were placed in a 48-well parallel reaction mounted on a Large Capacity Mixer (Glas-Col) that enabled several reactions to be performed simultaneously under a constant pressure of (approx 1 atm) with controlled temperature and orbital agitation. The headspace above the tubes was purged with oxygen gas for ca. 5 min. The

reactions were vortexed for 17 hr under 1 atm of O<sub>2</sub>. After the reactions were stopped, *n*-hexadecane was added to the reaction mixture as an internal standard. Samples were evaluated by GC for the products and remaining starting materials.

### 3. Determination of Initial Reaction Rates

In a disposable culture tube, palladium acetate (4.2 mg, 0.019 mmol), ligand (0.038 mmol), trifluoroacetic acid (2.6 mg, 0.023 mmol), copper triflate (6.8 mg, 0.019 mmol), *o*-xylene (0.4 g) and acetic acid (0.4 g) were combined. Reaction tubes were placed in a 48-well aluminum block mounted on a Large Capacity Mixer (Glas-Col) that enabled several reactions to be performed simultaneously under a constant pressure of O<sub>2</sub> (approx 1 atm) with controlled temperature and orbital agitation. The headspace above the tubes was purged with oxygen gas for ca. 5 min. The reactions were vortexed for 6 hr under 1 atm of O<sub>2</sub>. The reaction mixture was sampled at 1 h, 2 h, 4 h and 6 h reaction times (20 μL aliquots). After the aliquots were diluted with dioxane (400 mg), *n*-hexadecane (20 mg) was added to the sampled reaction mixture as an internal standard. Samples were evaluated by GC for the products and remaining starting materials. The initial reaction rates were determined according to previously reported methods,<sup>1</sup> involving plotting the rates obtained from each of the four time intervals (0–1 h, 1–2 h, 2–4 h and 4–6 h) vs. reaction time, and extrapolating these points back to *t* = 0. In nearly all cases, the conversion at 6 h was less than 10% of total substrate.

### 4. Synthesis of *trans*-(<sup>2</sup>Fpy)<sub>2</sub>Pd(TFA)<sub>2</sub>.<sup>2</sup>

A solution of Pd(OAc)<sub>2</sub> (206.1 mg, 0.92 mmol) and 2-fluoropyridine (265.9 mg, 2.7 mmol) in dry benzene (7 ml) was stirred with CF<sub>3</sub>CO<sub>2</sub>H (293.9 mg, 2.6 mmol) at room temperature for 5 hr. Dry pentane (15 ml) was added and after 5 min of stirring the pale yellow solid was separated by filtration, washed with dry pentane (5 ml) three times, and dried under vacuum (quantitative yield). Recrystallization of the complex was done from benzene-pentane at 0 °C, and the structure was determined by X-ray crystallography (see below).

<sup>1</sup>H NMR (300 MHz, C<sub>6</sub>D<sub>6</sub>) δ 5.65 (d, *J* = 8.6 Hz, 2H), δ 5.85 (m, 2H), δ 6.25 (m, 2H), δ 8.35 (dd, 2H, 5.7 Hz, 2.0 Hz), ; <sup>19</sup>F NMR (282 MHz, C<sub>6</sub>D<sub>6</sub>) δ -78.4, δ -65.0.

---

<sup>1</sup> This method is previously used in many references. For example, a) Schuh M. D.; *J. Chem. Educ.* **1988**, *65*, 740-741.; b) Corma, A.; Cid, R.; Agudo, A. L.; *Can. J. Chem. Eng.* **1979**, *57*, 638-642.

<sup>2</sup> A similar procedure was employed in the preparation of [Pd(TFA)<sub>2</sub>(py)<sub>2</sub>]: Trend, R. M.; Ramtohol, Y. K., Stoltz, B. M.; *J. Am. Chem. Soc.* **2005**, *127*, 17778-17788.

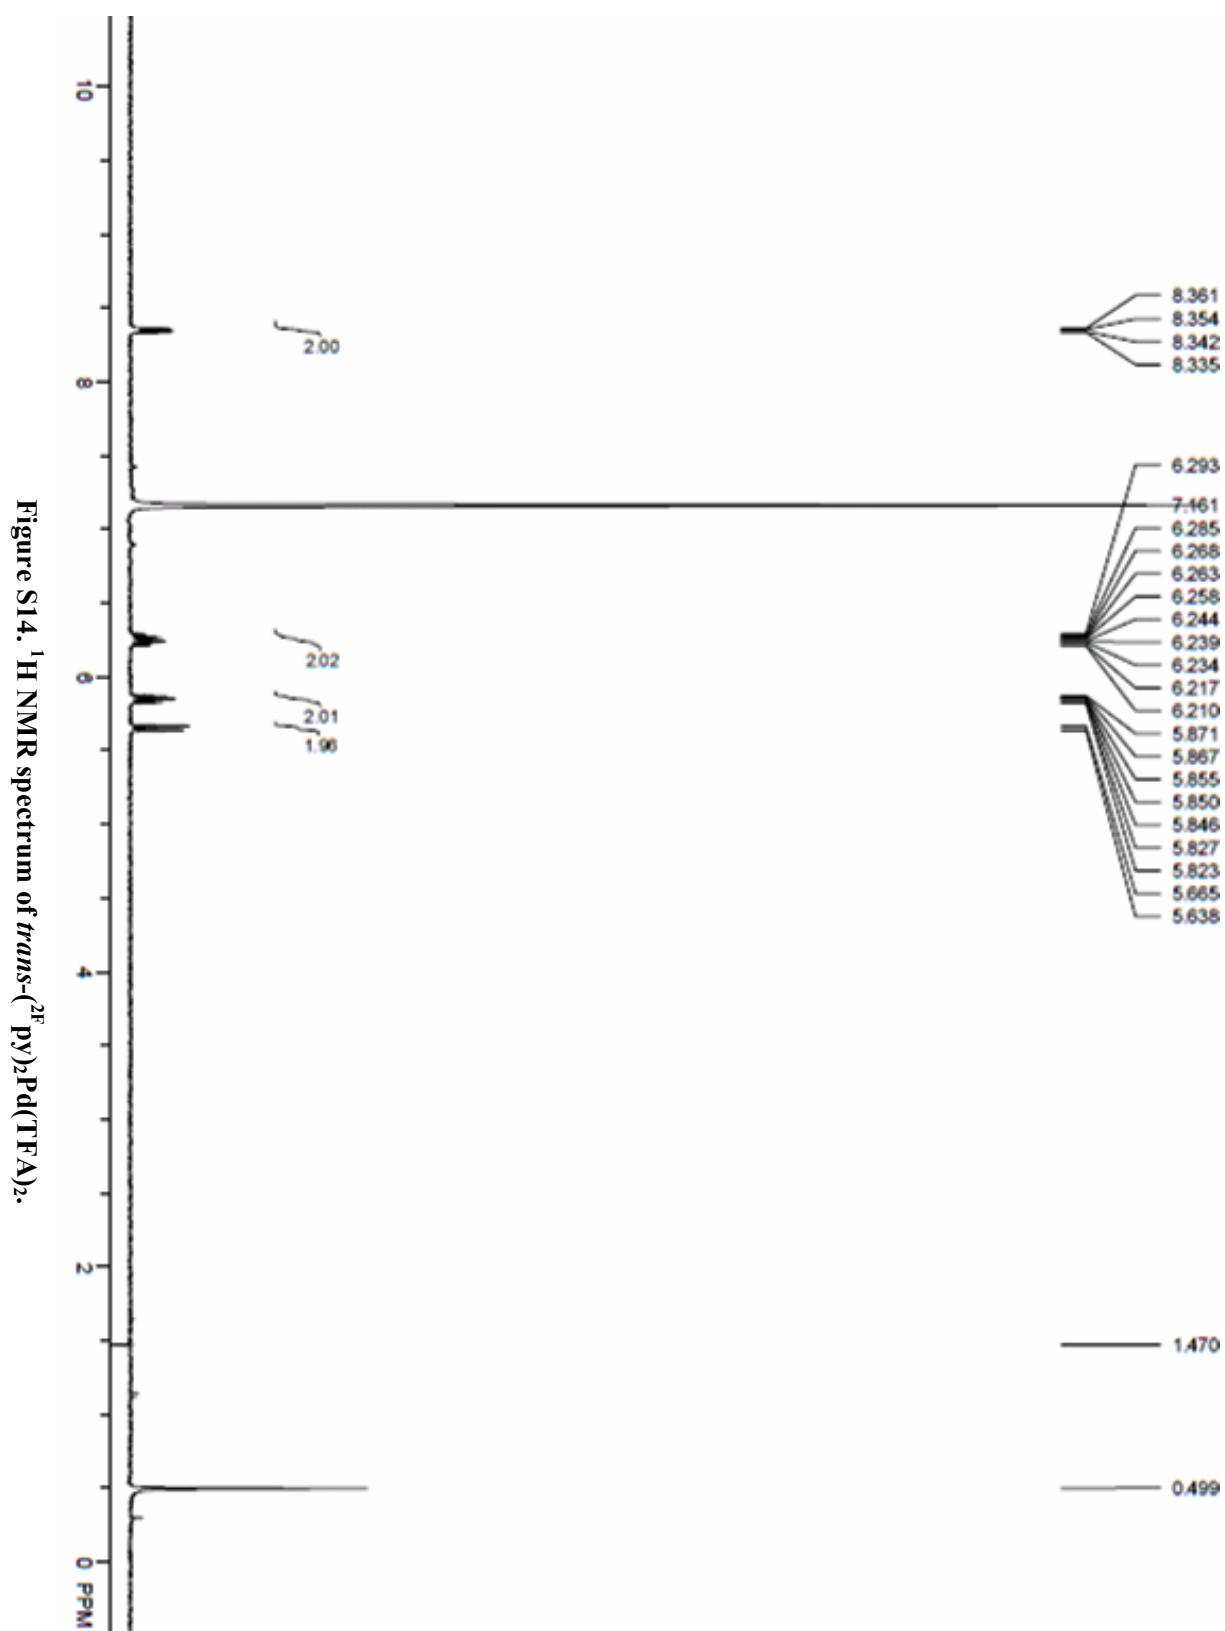

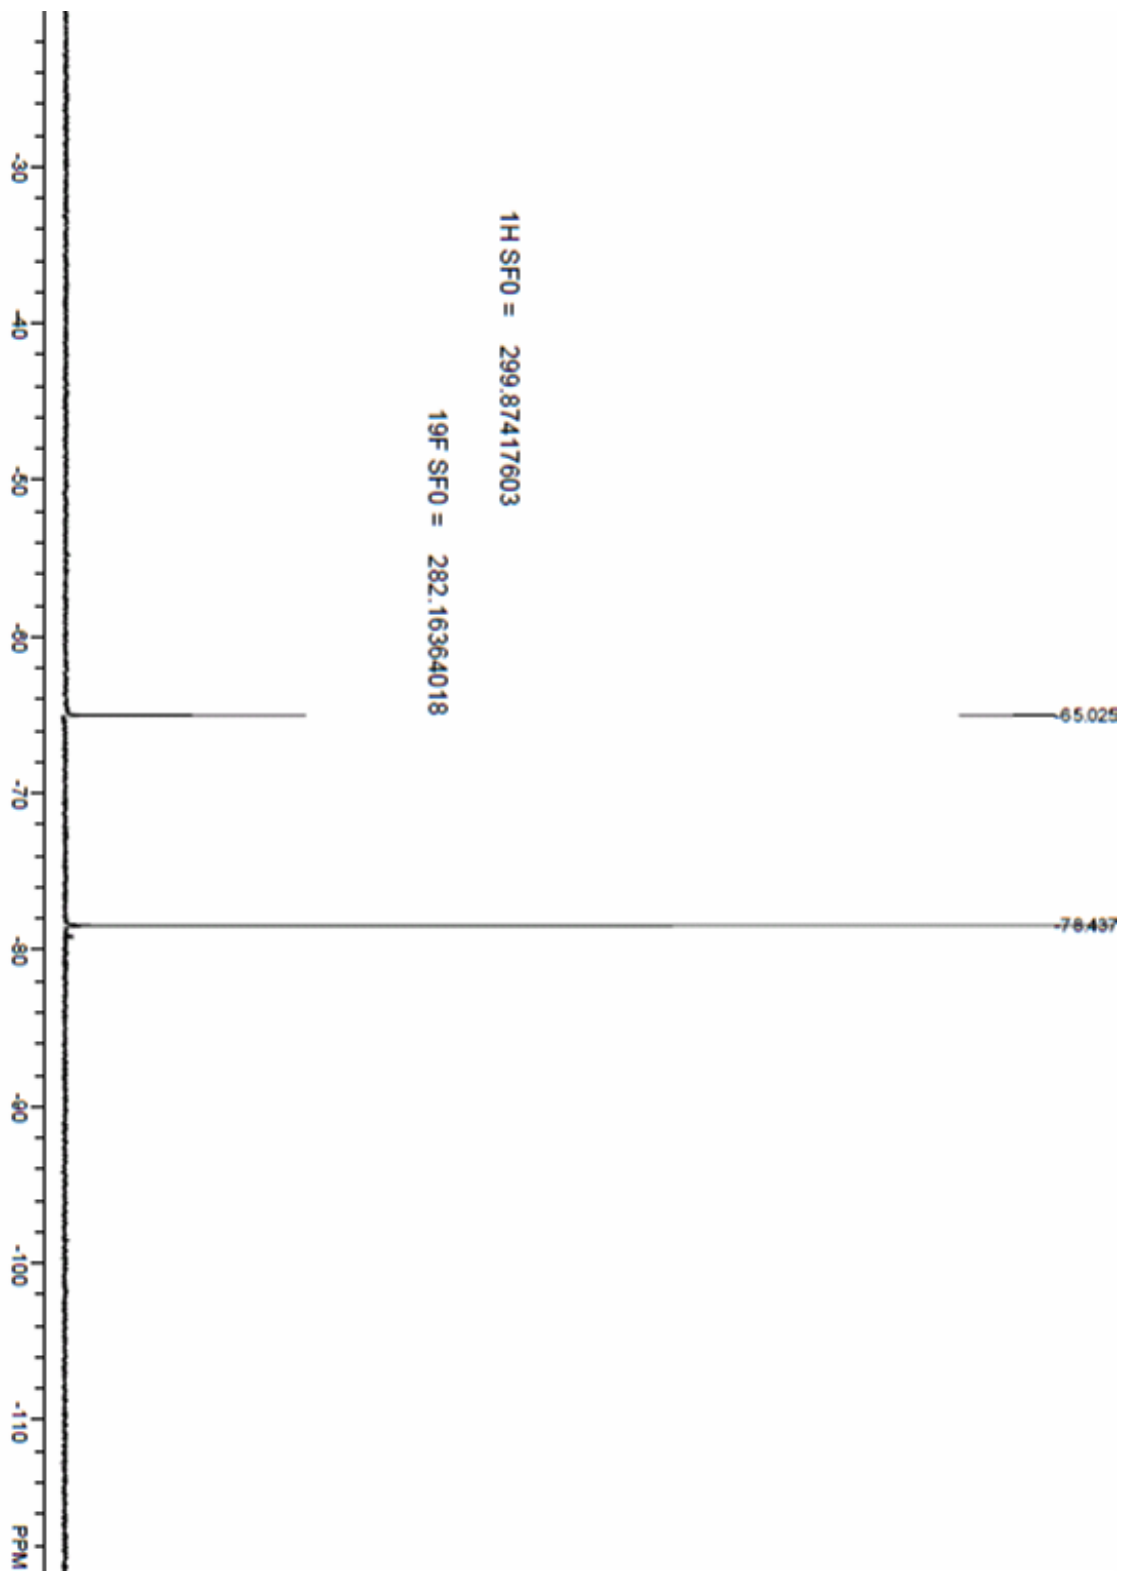

Figure S15.  $^{19}\text{F}$  NMR spectrum of *trans*-( $^{2}\text{F}$ ) $_2\text{Pd}(\text{TFA})_2$ .

## Crystallographic Characterization of *trans*-(<sup>2</sup>Fpy)<sub>2</sub>Pd (TFA)<sub>2</sub>.

### Data Collection

A yellow crystal with approximate dimensions 0.33 x 0.16 x 0.07 mm<sup>3</sup> was selected under oil under ambient conditions and attached to the tip of a MiTeGen MicroMount©. The crystal was mounted in a stream of cold nitrogen at 100(1) K and centered in the X-ray beam by using a video camera.

The crystal evaluation and data collection were performed on a Bruker SMART APEXII diffractometer with Cu K<sub>α</sub> (λ = 1.54178 Å) radiation and the diffractometer to crystal distance of 4.03 cm.

The initial cell constants were obtained from three series of ω scans at different starting angles. Each series consisted of 50 frames collected at intervals of 0.5° in a 25° range about ω with the exposure time of 5 seconds per frame. The reflections were successfully indexed by an automated indexing routine built in the APEXII program. The final cell constants were calculated from a set of 9823 strong reflections from the actual data collection.

The data were collected by using the full sphere data collection routine to survey the reciprocal space to the extent of a full sphere to a resolution of 0.82 Å. A total of 36697 data were harvested by collecting 18 sets of frames with 0.8° scans in ω with an exposure time 10-20 sec per frame. These highly redundant datasets were corrected for Lorentz and polarization effects. The absorption correction was based on fitting a function to the empirical transmission surface as sampled by multiple equivalent measurements. [1]

### Structure Solution and Refinement

The systematic absences in the diffraction data were uniquely consistent for the space group P2<sub>1</sub>/c that yielded chemically reasonable and computationally stable results of refinement [2-3]. A successful solution by the direct methods provided most non-hydrogen atoms from the *E*-map. The remaining non-hydrogen atoms were located in an alternating series of least-squares cycles and difference Fourier maps. All non-hydrogen atoms were refined with anisotropic displacement coefficients. All hydrogen atoms were included in the structure factor calculation at idealized positions and were allowed to ride on the neighboring atoms with relative isotropic displacement coefficients.

There are 1.5 independent Pd complexes in the asymmetric unit. The complex containing atom Pd1 is entirely in the asymmetric unit and the complex containing atom Pd2 lies on a crystallographic inversion center. Atoms F9-F11 are disordered over two positions with a minor component contribution of 22.6(7)% and were refined with restraints. There is one high residual peak (2.083 e/Å<sup>3</sup>) near the disordered fluorine atoms, but it was not reasonable to split the fluorine atoms over more positions.

The final least-squares refinement of 405 parameters against 4838 data resulted in residuals *R* (based on *F*<sup>2</sup> for *I* ≥ 2σ) and *wR* (based on *F*<sup>2</sup> for all data) of 0.0396 and 0.1083, respectively.

The molecular diagram is drawn with 50% probability ellipsoids.

### References

- [1] Bruker-AXS. (2000-2007) SADABS, SAINT, and SMART 5.622 Software Reference Manuals. Bruker-AXS, Madison, Wisconsin, USA.
- [2] Sheldrick, G. M. (2008). SHELXL. *Acta Cryst.* **A64**, 112-122.
- [3] Guzei, I.A. (2006-2008). Internal laboratory computer programs "Inserter", "FCF\_filter", "Modicifer".
- [4] Pennington, W.T. (1999) *J. Appl. Cryst.* **32**(5), 1028-1029.
- [5] Dolomanov, O.V.; Bourhis, L.J.; Gildea, R.J.; Howard, J.A.K.; Puschmann, H. "OLEX2: a complete structure solution, refinement and analysis program". *J. Appl. Cryst.* (2009) **42**, 339-341.



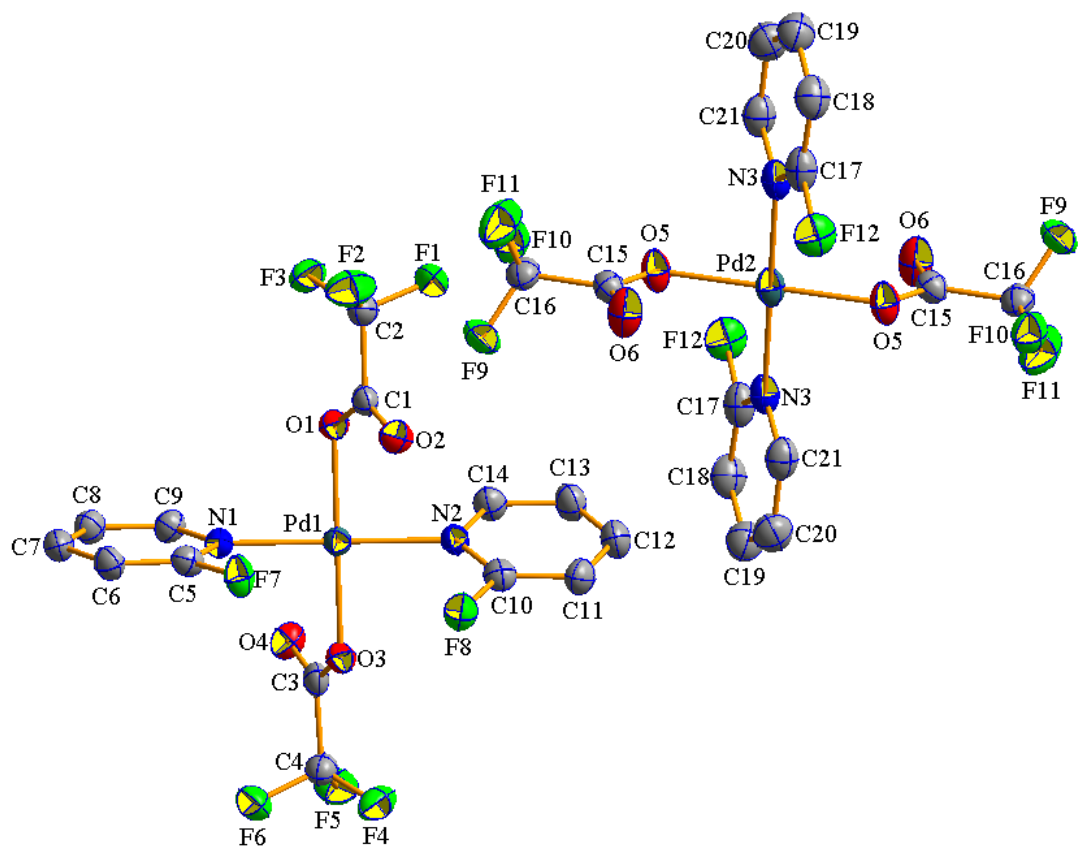

**Figure S16.** A molecular drawing of stahl89 [4]. All hydrogen atoms and the minor components of disordered atoms were omitted for clarity. The complex containing Pd2 lies on a crystallographic inversion center.

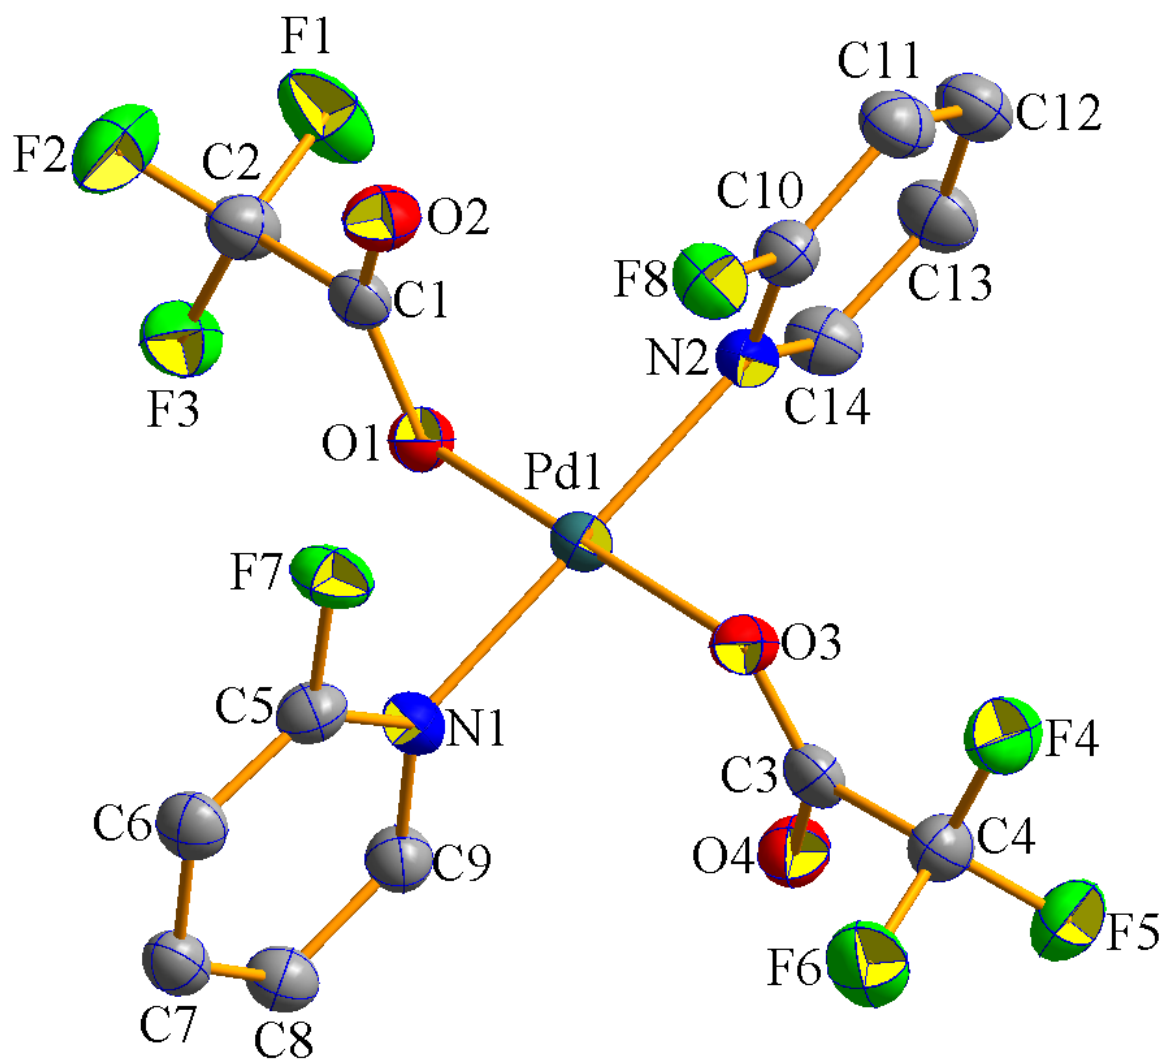

**Figure S17.** A drawing of the complex containing Pd1 [4]. All hydrogen were omitted for clarity.

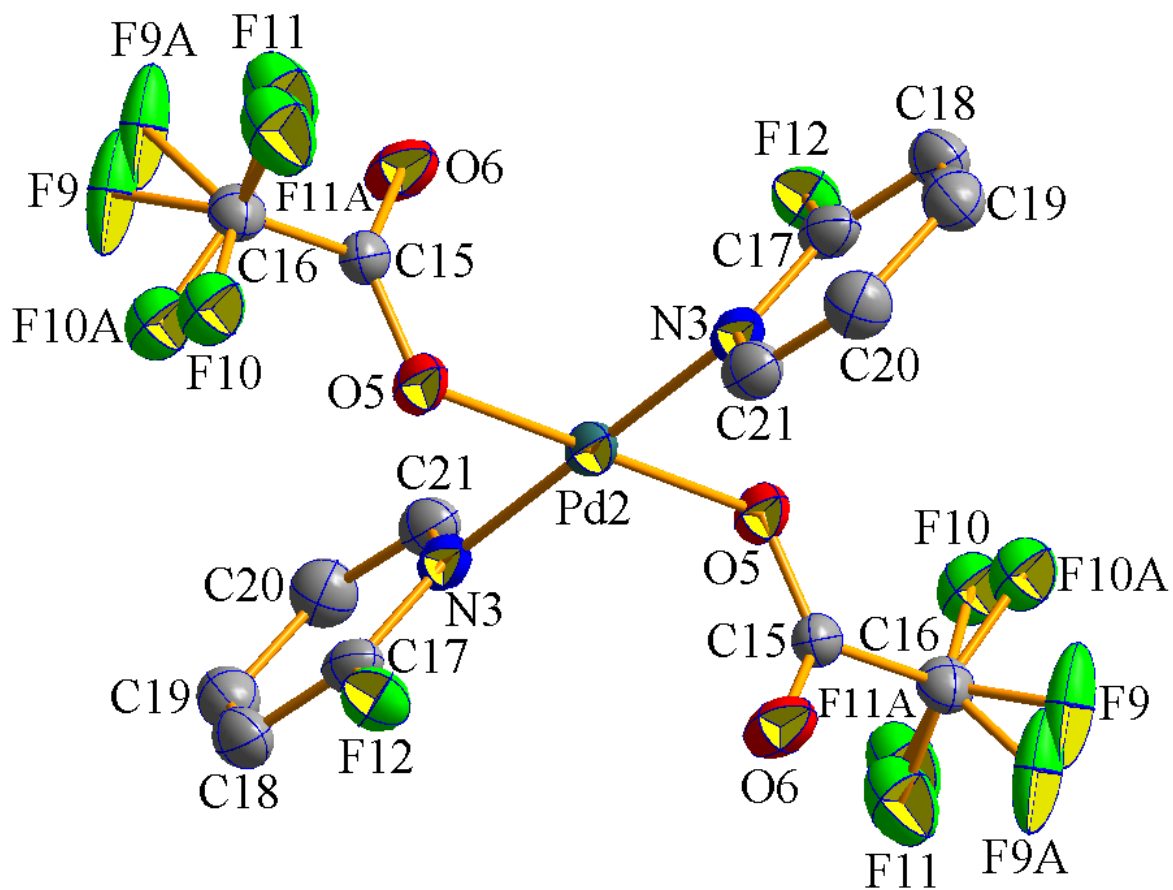

**Figure S18.** A drawing of the complex containing Pd2 [4]. All hydrogen atoms were omitted for clarity. The complex containing Pd2 lies on a crystallographic inversion center. Atoms F9-F11 are disordered over two positions.

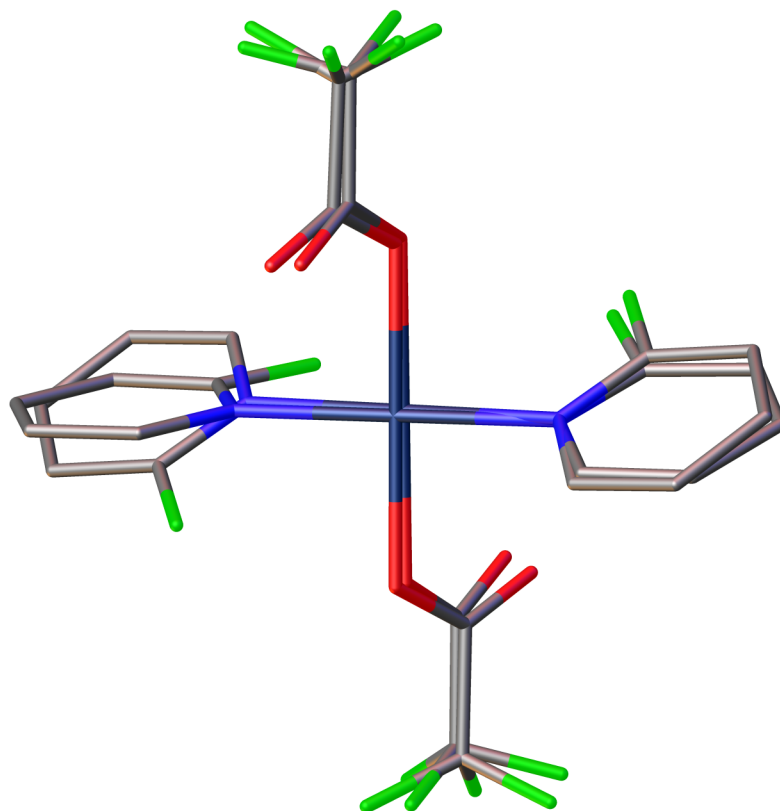

**Figure S19.** An overlap diagram of the two Pd complexes [5]. All hydrogen atoms and minor components of the disordered atoms were omitted for clarity.

**Table S2.** Crystal data and structure refinement for stahl89.

|                                       |                                                                    |                               |
|---------------------------------------|--------------------------------------------------------------------|-------------------------------|
| Identification code                   | stahl89                                                            |                               |
| Empirical formula                     | $C_{14}H_8F_8N_2O_4Pd$                                             |                               |
| Formula weight                        | 526.62                                                             |                               |
| Temperature                           | 100(1) K                                                           |                               |
| Wavelength                            | 1.54178 Å                                                          |                               |
| Crystal system                        | Monoclinic                                                         |                               |
| Space group                           | $P2_1/c$                                                           |                               |
| Unit cell dimensions                  | $a = 8.9376(2)$ Å                                                  | $\alpha = 90^\circ$ .         |
|                                       | $b = 31.0376(7)$ Å                                                 | $\beta = 97.4790(10)^\circ$ . |
|                                       | $c = 9.5220(2)$ Å                                                  | $\gamma = 90^\circ$ .         |
| Volume                                | $2618.95(10)$ Å <sup>3</sup>                                       |                               |
| Z                                     | 6                                                                  |                               |
| Density (calculated)                  | $2.003$ Mg/m <sup>3</sup>                                          |                               |
| Absorption coefficient                | $9.624$ mm <sup>-1</sup>                                           |                               |
| F(000)                                | 1536                                                               |                               |
| Crystal size                          | $0.33 \times 0.16 \times 0.07$ mm <sup>3</sup>                     |                               |
| Theta range for data collection       | $2.85$ to $69.44^\circ$ .                                          |                               |
| Index ranges                          | $-10 \leq h \leq 10$ , $-37 \leq k \leq 35$ , $-11 \leq l \leq 11$ |                               |
| Reflections collected                 | 36697                                                              |                               |
| Independent reflections               | 4838 [R(int) = 0.0357]                                             |                               |
| Completeness to theta = $67.00^\circ$ | 99.6 %                                                             |                               |
| Absorption correction                 | Analytical with SADABS                                             |                               |
| Max. and min. transmission            | 0.5523 and 0.1434                                                  |                               |
| Refinement method                     | Full-matrix least-squares on F <sup>2</sup>                        |                               |
| Data / restraints / parameters        | 4838 / 21 / 405                                                    |                               |
| Goodness-of-fit on F <sup>2</sup>     | 1.228                                                              |                               |
| Final R indices [I > 2sigma(I)]       | R1 = 0.0396, wR2 = 0.1063                                          |                               |
| R indices (all data)                  | R1 = 0.0423, wR2 = 0.1083                                          |                               |
| Largest diff. peak and hole           | $2.083$ and $-1.731$ e.Å <sup>-3</sup>                             |                               |

**Table S3.** Atomic coordinates ( $\times 10^4$ ) and equivalent isotropic displacement parameters ( $\text{\AA}^2 \times 10^3$ ) for stahl89.  $U(\text{eq})$  is defined as one third of the trace of the orthogonalized  $U^{ij}$  tensor.

|        | x        | y       | z        | $U(\text{eq})$ |
|--------|----------|---------|----------|----------------|
| Pd(1)  | 1680(1)  | 3353(1) | 7902(1)  | 26(1)          |
| F(1)   | 5308(4)  | 4004(1) | 5144(3)  | 61(1)          |
| F(2)   | 6891(3)  | 3570(1) | 6286(4)  | 58(1)          |
| F(3)   | 6042(3)  | 4102(1) | 7357(3)  | 46(1)          |
| F(4)   | -2824(3) | 2659(1) | 8283(3)  | 48(1)          |
| F(5)   | -3645(3) | 3210(1) | 9305(3)  | 48(1)          |
| F(6)   | -2189(3) | 2754(1) | 10510(3) | 51(1)          |
| F(7)   | 3488(3)  | 2652(1) | 9298(3)  | 39(1)          |
| F(8)   | 952(3)   | 2692(1) | 5667(3)  | 40(1)          |
| O(1)   | 3495(3)  | 3692(1) | 7501(3)  | 30(1)          |
| O(2)   | 4202(4)  | 3167(1) | 6092(3)  | 36(1)          |
| O(3)   | -159(3)  | 3021(1) | 8298(3)  | 30(1)          |
| O(4)   | -902(4)  | 3578(1) | 9545(3)  | 37(1)          |
| N(1)   | 2655(4)  | 3290(1) | 9931(4)  | 28(1)          |
| N(2)   | 723(4)   | 3408(1) | 5869(4)  | 29(1)          |
| C(1)   | 4326(5)  | 3512(1) | 6670(4)  | 28(1)          |
| C(2)   | 5661(5)  | 3803(2) | 6382(5)  | 36(1)          |
| C(3)   | -1031(5) | 3222(1) | 9019(4)  | 31(1)          |
| C(4)   | -2445(5) | 2957(2) | 9265(5)  | 35(1)          |
| C(5)   | 3431(5)  | 2937(1) | 10328(5) | 30(1)          |
| C(6)   | 4155(5)  | 2859(1) | 11658(5) | 33(1)          |
| C(7)   | 4064(5)  | 3177(2) | 12670(5) | 33(1)          |
| C(8)   | 3252(5)  | 3549(2) | 12293(5) | 34(1)          |
| C(9)   | 2559(5)  | 3601(1) | 10928(5) | 32(1)          |
| C(10)  | 508(5)   | 3065(1) | 5040(5)  | 32(1)          |
| C(11)  | -123(5)  | 3071(2) | 3646(5)  | 39(1)          |
| C(12)  | -589(6)  | 3469(2) | 3098(5)  | 40(1)          |
| C(13)  | -398(6)  | 3832(2) | 3935(5)  | 40(1)          |
| C(14)  | 260(5)   | 3792(1) | 5325(5)  | 36(1)          |
| Pd(2)  | 0        | 5000    | 0        | 34(1)          |
| F(9)   | 1598(8)  | 4749(2) | 5168(4)  | 80(2)          |
| F(10)  | 1845(5)  | 5393(1) | 4554(4)  | 50(1)          |
| F(11)  | 3512(2)  | 4966(2) | 4319(5)  | 72(2)          |
| F(9A)  | 2195(19) | 4646(3) | 5038(12) | 80(2)          |
| F(10A) | 1260(7)  | 5253(2) | 4791(12) | 50(1)          |
| F(11A) | 3487(4)  | 5135(4) | 4400(12) | 72(2)          |
| F(12)  | 2239(3)  | 4506(1) | -1474(3) | 48(1)          |
| O(5)   | 790(4)   | 5151(1) | 2020(3)  | 40(1)          |
| O(6)   | 1821(5)  | 4499(1) | 2322(4)  | 51(1)          |
| N(3)   | 1989(4)  | 5172(1) | -626(4)  | 36(1)          |
| C(15)  | 1537(5)  | 4861(1) | 2724(4)  | 32(1)          |
| C(16)  | 2119(4)  | 4989(1) | 4241(4)  | 37(1)          |
| C(17)  | 2780(6)  | 4907(2) | -1334(5) | 40(1)          |
| C(18)  | 4076(6)  | 5016(2) | -1884(6) | 45(1)          |
| C(19)  | 4568(6)  | 5433(2) | -1675(6) | 48(1)          |

|       |         |         |         |       |
|-------|---------|---------|---------|-------|
| C(20) | 3787(6) | 5717(2) | -917(6) | 48(1) |
| C(21) | 2506(6) | 5578(2) | -415(5) | 41(1) |

---

**Table S4.** Bond lengths [Å] and angles [°] for stahl89.

|                  |            |                |          |
|------------------|------------|----------------|----------|
| Pd(1)-O(1)       | 2.011(3)   | C(11)-C(12)    | 1.384(7) |
| Pd(1)-O(3)       | 2.015(3)   | C(11)-H(11)    | 0.9500   |
| Pd(1)-N(2)       | 2.019(4)   | C(12)-C(13)    | 1.377(7) |
| Pd(1)-N(1)       | 2.023(4)   | C(12)-H(12)    | 0.9500   |
| F(1)-C(2)        | 1.333(5)   | C(13)-C(14)    | 1.382(6) |
| F(2)-C(2)        | 1.329(6)   | C(13)-H(13)    | 0.9500   |
| F(3)-C(2)        | 1.323(5)   | C(14)-H(14)    | 0.9500   |
| F(4)-C(4)        | 1.327(5)   | Pd(2)-O(5)#1   | 2.016(3) |
| F(5)-C(4)        | 1.333(5)   | Pd(2)-O(5)     | 2.016(3) |
| F(6)-C(4)        | 1.337(5)   | Pd(2)-N(3)#1   | 2.019(4) |
| F(7)-C(5)        | 1.327(5)   | Pd(2)-N(3)     | 2.019(4) |
| F(8)-C(10)       | 1.340(5)   | F(9)-C(16)     | 1.288(4) |
| O(1)-C(1)        | 1.281(5)   | F(10)-C(16)    | 1.321(4) |
| O(2)-C(1)        | 1.203(5)   | F(11)-C(16)    | 1.240(4) |
| O(3)-C(3)        | 1.267(5)   | F(9A)-C(16)    | 1.304(5) |
| O(4)-C(3)        | 1.212(5)   | F(10A)-C(16)   | 1.281(5) |
| N(1)-C(5)        | 1.325(6)   | F(11A)-C(16)   | 1.295(5) |
| N(1)-C(9)        | 1.365(6)   | F(12)-C(17)    | 1.335(6) |
| N(2)-C(10)       | 1.323(6)   | O(5)-C(15)     | 1.259(5) |
| N(2)-C(14)       | 1.345(6)   | O(6)-C(15)     | 1.224(5) |
| C(1)-C(2)        | 1.550(6)   | N(3)-C(17)     | 1.325(6) |
| C(3)-C(4)        | 1.550(6)   | N(3)-C(21)     | 1.348(6) |
| C(5)-C(6)        | 1.367(6)   | C(15)-C(16)    | 1.522(5) |
| C(6)-C(7)        | 1.389(6)   | C(17)-C(18)    | 1.375(8) |
| C(6)-H(6)        | 0.9500     | C(18)-C(19)    | 1.374(8) |
| C(7)-C(8)        | 1.387(6)   | C(18)-H(18)    | 0.9500   |
| C(7)-H(7)        | 0.9500     | C(19)-C(20)    | 1.383(8) |
| C(8)-C(9)        | 1.374(6)   | C(19)-H(19)    | 0.9500   |
| C(8)-H(8)        | 0.9500     | C(20)-C(21)    | 1.367(8) |
| C(9)-H(9)        | 0.9500     | C(20)-H(20)    | 0.9500   |
| C(10)-C(11)      | 1.373(6)   | C(21)-H(21)    | 0.9500   |
| O(1)-Pd(1)-O(3)  | 179.10(12) | F(3)-C(2)-F(2) | 106.9(4) |
| O(1)-Pd(1)-N(2)  | 91.42(13)  | F(3)-C(2)-F(1) | 107.7(4) |
| O(3)-Pd(1)-N(2)  | 88.22(13)  | F(2)-C(2)-F(1) | 107.2(4) |
| O(1)-Pd(1)-N(1)  | 88.50(13)  | F(3)-C(2)-C(1) | 114.7(4) |
| O(3)-Pd(1)-N(1)  | 91.87(13)  | F(2)-C(2)-C(1) | 110.9(4) |
| N(2)-Pd(1)-N(1)  | 179.18(14) | F(1)-C(2)-C(1) | 109.2(4) |
| C(1)-O(1)-Pd(1)  | 115.9(3)   | O(4)-C(3)-O(3) | 129.7(4) |
| C(3)-O(3)-Pd(1)  | 115.2(3)   | O(4)-C(3)-C(4) | 117.1(4) |
| C(5)-N(1)-C(9)   | 117.7(4)   | O(3)-C(3)-C(4) | 113.1(4) |
| C(5)-N(1)-Pd(1)  | 119.7(3)   | F(4)-C(4)-F(5) | 107.4(4) |
| C(9)-N(1)-Pd(1)  | 122.6(3)   | F(4)-C(4)-F(6) | 107.1(4) |
| C(10)-N(2)-C(14) | 118.0(4)   | F(5)-C(4)-F(6) | 107.3(4) |
| C(10)-N(2)-Pd(1) | 120.9(3)   | F(4)-C(4)-C(3) | 113.7(4) |
| C(14)-N(2)-Pd(1) | 121.0(3)   | F(5)-C(4)-C(3) | 111.5(4) |
| O(2)-C(1)-O(1)   | 130.0(4)   | F(6)-C(4)-C(3) | 109.6(4) |
| O(2)-C(1)-C(2)   | 117.8(4)   | N(1)-C(5)-F(7) | 114.2(4) |
| O(1)-C(1)-C(2)   | 112.2(4)   | N(1)-C(5)-C(6) | 125.3(4) |



|                     |            |                     |          |
|---------------------|------------|---------------------|----------|
| F(7)-C(5)-C(6)      | 120.5(4)   | C(15)-O(5)-Pd(2)    | 116.0(3) |
| C(5)-C(6)-C(7)      | 116.9(4)   | C(17)-N(3)-C(21)    | 117.5(4) |
| C(5)-C(6)-H(6)      | 121.5      | C(17)-N(3)-Pd(2)    | 122.3(3) |
| C(7)-C(6)-H(6)      | 121.5      | C(21)-N(3)-Pd(2)    | 120.1(3) |
| C(8)-C(7)-C(6)      | 119.3(4)   | O(6)-C(15)-O(5)     | 127.3(4) |
| C(8)-C(7)-H(7)      | 120.4      | O(6)-C(15)-C(16)    | 118.5(4) |
| C(6)-C(7)-H(7)      | 120.4      | O(5)-C(15)-C(16)    | 114.3(4) |
| C(9)-C(8)-C(7)      | 119.8(4)   | F(10A)-C(16)-F(11A) | 109.5(6) |
| C(9)-C(8)-H(8)      | 120.1      | F(9)-C(16)-F(11)    | 112.0(5) |
| C(7)-C(8)-H(8)      | 120.1      | F(10A)-C(16)-F(9A)  | 105.8(7) |
| N(1)-C(9)-C(8)      | 121.0(4)   | F(11A)-C(16)-F(9A)  | 104.0(7) |
| N(1)-C(9)-H(9)      | 119.5      | F(9)-C(16)-F(10)    | 107.6(4) |
| C(8)-C(9)-H(9)      | 119.5      | F(11)-C(16)-F(10)   | 104.8(4) |
| N(2)-C(10)-F(8)     | 114.7(4)   | F(9)-C(16)-C(15)    | 113.0(4) |
| N(2)-C(10)-C(11)    | 125.1(4)   | F(10A)-C(16)-C(15)  | 114.0(6) |
| F(8)-C(10)-C(11)    | 120.2(4)   | F(11A)-C(16)-C(15)  | 113.8(6) |
| C(10)-C(11)-C(12)   | 116.2(4)   | F(11)-C(16)-C(15)   | 105.0(3) |
| C(10)-C(11)-H(11)   | 121.9      | F(9A)-C(16)-C(15)   | 109.0(6) |
| C(12)-C(11)-H(11)   | 121.9      | F(10)-C(16)-C(15)   | 114.2(3) |
| C(13)-C(12)-C(11)   | 120.2(4)   | N(3)-C(17)-F(12)    | 114.8(5) |
| C(13)-C(12)-H(12)   | 119.9      | N(3)-C(17)-C(18)    | 124.9(5) |
| C(11)-C(12)-H(12)   | 119.9      | F(12)-C(17)-C(18)   | 120.3(4) |
| C(12)-C(13)-C(14)   | 119.1(4)   | C(19)-C(18)-C(17)   | 116.5(5) |
| C(12)-C(13)-H(13)   | 120.4      | C(19)-C(18)-H(18)   | 121.7    |
| C(14)-C(13)-H(13)   | 120.4      | C(17)-C(18)-H(18)   | 121.7    |
| N(2)-C(14)-C(13)    | 121.3(4)   | C(18)-C(19)-C(20)   | 120.1(5) |
| N(2)-C(14)-H(14)    | 119.4      | C(18)-C(19)-H(19)   | 119.9    |
| C(13)-C(14)-H(14)   | 119.4      | C(20)-C(19)-H(19)   | 119.9    |
| O(5)#1-Pd(2)-O(5)   | 180.00(18) | C(21)-C(20)-C(19)   | 119.0(5) |
| O(5)#1-Pd(2)-N(3)#1 | 90.46(15)  | C(21)-C(20)-H(20)   | 120.5    |
| O(5)-Pd(2)-N(3)#1   | 89.54(15)  | C(19)-C(20)-H(20)   | 120.5    |
| O(5)#1-Pd(2)-N(3)   | 89.54(15)  | N(3)-C(21)-C(20)    | 121.9(5) |
| O(5)-Pd(2)-N(3)     | 90.46(15)  | N(3)-C(21)-H(21)    | 119.0    |
| N(3)#1-Pd(2)-N(3)   | 180.0(2)   | C(20)-C(21)-H(21)   | 119.0    |

---

Symmetry transformations used to generate equivalent atoms:

#1 -x,-y+1,-z

**Table S5.** Anisotropic displacement parameters ( $\text{\AA}^2 \times 10^3$ ) for stahl89. The anisotropic displacement factor exponent takes the form:  $-2\pi^2 [h^2 a^{*2} U^{11} + \dots + 2 h k a^* b^* U^{12}]$

|        | U <sup>11</sup> | U <sup>22</sup> | U <sup>33</sup> | U <sup>23</sup> | U <sup>13</sup> | U <sup>12</sup> |
|--------|-----------------|-----------------|-----------------|-----------------|-----------------|-----------------|
| Pd(1)  | 28(1)           | 26(1)           | 24(1)           | -1(1)           | 3(1)            | 0(1)            |
| F(1)   | 71(2)           | 68(2)           | 39(2)           | 18(2)           | -7(1)           | -33(2)          |
| F(2)   | 42(2)           | 59(2)           | 75(2)           | -10(2)          | 23(2)           | -4(1)           |
| F(3)   | 46(2)           | 50(2)           | 43(2)           | -11(1)          | 8(1)            | -17(1)          |
| F(4)   | 39(2)           | 58(2)           | 48(2)           | -16(1)          | 8(1)            | -13(1)          |
| F(5)   | 34(1)           | 56(2)           | 56(2)           | 1(1)            | 14(1)           | 4(1)            |
| F(6)   | 49(2)           | 61(2)           | 43(2)           | 18(1)           | 4(1)            | -9(1)           |
| F(7)   | 54(2)           | 33(1)           | 28(1)           | -5(1)           | 4(1)            | 9(1)            |
| F(8)   | 46(2)           | 35(1)           | 37(1)           | -1(1)           | -1(1)           | 2(1)            |
| O(1)   | 30(1)           | 31(2)           | 30(2)           | -2(1)           | 5(1)            | -3(1)           |
| O(2)   | 41(2)           | 33(2)           | 36(2)           | -4(1)           | 10(1)           | -2(1)           |
| O(3)   | 33(2)           | 33(2)           | 27(2)           | -2(1)           | 7(1)            | -2(1)           |
| O(4)   | 36(2)           | 36(2)           | 40(2)           | -8(1)           | 5(1)            | 2(1)            |
| N(1)   | 30(2)           | 30(2)           | 25(2)           | 1(1)            | 0(1)            | -3(1)           |
| N(2)   | 28(2)           | 34(2)           | 23(2)           | -1(1)           | 4(1)            | -1(1)           |
| C(1)   | 30(2)           | 32(2)           | 22(2)           | 4(2)            | 1(2)            | 1(2)            |
| C(2)   | 39(2)           | 37(2)           | 30(2)           | -2(2)           | 6(2)            | -8(2)           |
| C(3)   | 32(2)           | 37(2)           | 22(2)           | 3(2)            | -2(2)           | 2(2)            |
| C(4)   | 31(2)           | 42(2)           | 32(2)           | -2(2)           | 5(2)            | -3(2)           |
| C(5)   | 33(2)           | 27(2)           | 32(2)           | -1(2)           | 9(2)            | 0(2)            |
| C(6)   | 38(2)           | 31(2)           | 31(2)           | 4(2)            | 4(2)            | 2(2)            |
| C(7)   | 34(2)           | 36(2)           | 27(2)           | 2(2)            | 3(2)            | -4(2)           |
| C(8)   | 39(2)           | 33(2)           | 31(2)           | -3(2)           | 4(2)            | -1(2)           |
| C(9)   | 32(2)           | 30(2)           | 32(2)           | -3(2)           | 3(2)            | 1(2)            |
| C(10)  | 31(2)           | 34(2)           | 32(2)           | 0(2)            | 5(2)            | 3(2)            |
| C(11)  | 43(2)           | 42(3)           | 31(2)           | -6(2)           | 3(2)            | -6(2)           |
| C(12)  | 47(3)           | 47(3)           | 27(2)           | 3(2)            | 2(2)            | -2(2)           |
| C(13)  | 49(3)           | 39(2)           | 32(2)           | 6(2)            | 2(2)            | 2(2)            |
| C(14)  | 44(2)           | 30(2)           | 33(2)           | 0(2)            | 4(2)            | 1(2)            |
| Pd(2)  | 43(1)           | 32(1)           | 27(1)           | -3(1)           | 3(1)            | 7(1)            |
| F(9)   | 125(6)          | 85(3)           | 31(2)           | -3(2)           | 18(2)           | -64(4)          |
| F(10)  | 62(3)           | 43(2)           | 43(2)           | -9(2)           | 0(2)            | -2(2)           |
| F(11)  | 61(2)           | 97(5)           | 57(2)           | -32(3)          | 8(2)            | -10(2)          |
| F(9A)  | 125(6)          | 85(3)           | 31(2)           | -3(2)           | 18(2)           | -64(4)          |
| F(10A) | 62(3)           | 43(2)           | 43(2)           | -9(2)           | 0(2)            | -2(2)           |
| F(11A) | 61(2)           | 97(5)           | 57(2)           | -32(3)          | 8(2)            | -10(2)          |
| F(12)  | 58(2)           | 35(2)           | 52(2)           | -9(1)           | 10(1)           | 8(1)            |
| O(5)   | 55(2)           | 38(2)           | 27(2)           | -4(1)           | 2(1)            | 9(2)            |
| O(6)   | 69(2)           | 39(2)           | 42(2)           | -5(2)           | -8(2)           | 15(2)           |
| N(3)   | 44(2)           | 36(2)           | 26(2)           | -2(2)           | 1(2)            | 6(2)            |
| C(15)  | 31(2)           | 36(2)           | 31(2)           | 4(2)            | 7(2)            | 3(2)            |
| C(16)  | 29(2)           | 45(3)           | 36(2)           | -1(2)           | 4(2)            | -2(2)           |
| C(17)  | 49(3)           | 38(2)           | 33(2)           | -3(2)           | -1(2)           | 13(2)           |
| C(18)  | 49(3)           | 47(3)           | 39(3)           | -7(2)           | 7(2)            | 9(2)            |
| C(19)  | 43(3)           | 56(3)           | 44(3)           | -3(2)           | 6(2)            | 2(2)            |

|       |       |       |       |       |      |       |
|-------|-------|-------|-------|-------|------|-------|
| C(20) | 54(3) | 42(3) | 49(3) | -4(2) | 6(2) | -2(2) |
| C(21) | 49(3) | 38(2) | 36(2) | -5(2) | 1(2) | 7(2)  |

---

**Table S6.** Hydrogen coordinates ( $\times 10^4$ ) and isotropic displacement parameters ( $\text{\AA}^2 \times 10^3$ ) for stahl89.

|       | x     | y    | z     | U(eq) |
|-------|-------|------|-------|-------|
| H(6)  | 4696  | 2599 | 11881 | 40    |
| H(7)  | 4552  | 3140 | 13609 | 39    |
| H(8)  | 3176  | 3769 | 12976 | 41    |
| H(9)  | 2004  | 3856 | 10676 | 38    |
| H(11) | -234  | 2817 | 3089  | 46    |
| H(12) | -1041 | 3492 | 2141  | 48    |
| H(13) | -715  | 4106 | 3562  | 48    |
| H(14) | 387   | 4042 | 5907  | 43    |
| H(18) | 4605  | 4814 | -2384 | 54    |
| H(19) | 5446  | 5527 | -2051 | 57    |
| H(20) | 4136  | 6003 | -748  | 58    |
| H(21) | 1963  | 5773 | 97    | 50    |

**Table S7.** Torsion angles [°] for stahl89.

|                        |           |                         |           |
|------------------------|-----------|-------------------------|-----------|
| O(3)-Pd(1)-O(1)-C(1)   | -133(7)   | N(2)-C(10)-C(11)-C(12)  | -1.3(7)   |
| N(2)-Pd(1)-O(1)-C(1)   | -66.5(3)  | F(8)-C(10)-C(11)-C(12)  | 178.1(4)  |
| N(1)-Pd(1)-O(1)-C(1)   | 112.7(3)  | C(10)-C(11)-C(12)-C(13) | 0.5(7)    |
| O(1)-Pd(1)-O(3)-C(3)   | -41(7)    | C(11)-C(12)-C(13)-C(14) | -0.1(8)   |
| N(2)-Pd(1)-O(3)-C(3)   | -107.8(3) | C(10)-N(2)-C(14)-C(13)  | -1.1(7)   |
| N(1)-Pd(1)-O(3)-C(3)   | 73.0(3)   | Pd(1)-N(2)-C(14)-C(13)  | -179.9(4) |
| O(1)-Pd(1)-N(1)-C(5)   | -96.3(3)  | C(12)-C(13)-C(14)-N(2)  | 0.4(7)    |
| O(3)-Pd(1)-N(1)-C(5)   | 84.6(3)   | O(5)#1-Pd(2)-O(5)-C(15) | 114(100)  |
| N(2)-Pd(1)-N(1)-C(5)   | -12(11)   | N(3)#1-Pd(2)-O(5)-C(15) | 95.3(3)   |
| O(1)-Pd(1)-N(1)-C(9)   | 83.3(3)   | N(3)-Pd(2)-O(5)-C(15)   | -84.7(3)  |
| O(3)-Pd(1)-N(1)-C(9)   | -95.9(3)  | O(5)#1-Pd(2)-N(3)-C(17) | -55.3(4)  |
| N(2)-Pd(1)-N(1)-C(9)   | 168(17)   | O(5)-Pd(2)-N(3)-C(17)   | 124.7(4)  |
| O(1)-Pd(1)-N(2)-C(10)  | 114.3(3)  | N(3)#1-Pd(2)-N(3)-C(17) | 0(100)    |
| O(3)-Pd(1)-N(2)-C(10)  | -66.5(3)  | O(5)#1-Pd(2)-N(3)-C(21) | 120.1(3)  |
| N(1)-Pd(1)-N(2)-C(10)  | 30(11)    | O(5)-Pd(2)-N(3)-C(21)   | -59.9(3)  |
| O(1)-Pd(1)-N(2)-C(14)  | -67.0(3)  | N(3)#1-Pd(2)-N(3)-C(21) | 0(100)    |
| O(3)-Pd(1)-N(2)-C(14)  | 112.2(3)  | Pd(2)-O(5)-C(15)-O(6)   | -0.8(6)   |
| N(1)-Pd(1)-N(2)-C(14)  | -151(11)  | Pd(2)-O(5)-C(15)-C(16)  | 179.7(2)  |
| Pd(1)-O(1)-C(1)-O(2)   | -0.8(6)   | O(6)-C(15)-C(16)-F(9)   | -60.8(6)  |
| Pd(1)-O(1)-C(1)-C(2)   | 178.0(3)  | O(5)-C(15)-C(16)-F(9)   | 118.7(5)  |
| O(2)-C(1)-C(2)-F(3)    | -158.7(4) | O(6)-C(15)-C(16)-F(10A) | -148.0(4) |
| O(1)-C(1)-C(2)-F(3)    | 22.4(5)   | O(5)-C(15)-C(16)-F(10A) | 31.5(5)   |
| O(2)-C(1)-C(2)-F(2)    | -37.5(5)  | O(6)-C(15)-C(16)-F(11A) | 85.4(7)   |
| O(1)-C(1)-C(2)-F(2)    | 143.5(4)  | O(5)-C(15)-C(16)-F(11A) | -95.0(6)  |
| O(2)-C(1)-C(2)-F(1)    | 80.4(5)   | O(6)-C(15)-C(16)-F(11)  | 61.6(6)   |
| O(1)-C(1)-C(2)-F(1)    | -98.5(4)  | O(5)-C(15)-C(16)-F(11)  | -118.9(5) |
| Pd(1)-O(3)-C(3)-O(4)   | -2.7(6)   | O(6)-C(15)-C(16)-F(9A)  | -30.1(9)  |
| Pd(1)-O(3)-C(3)-C(4)   | 178.7(3)  | O(5)-C(15)-C(16)-F(9A)  | 149.4(8)  |
| O(4)-C(3)-C(4)-F(4)    | 156.1(4)  | O(6)-C(15)-C(16)-F(10)  | 175.8(4)  |
| O(3)-C(3)-C(4)-F(4)    | -25.1(5)  | O(5)-C(15)-C(16)-F(10)  | -4.7(5)   |
| O(4)-C(3)-C(4)-F(5)    | 34.5(5)   | C(21)-N(3)-C(17)-F(12)  | 178.1(4)  |
| O(3)-C(3)-C(4)-F(5)    | -146.6(4) | Pd(2)-N(3)-C(17)-F(12)  | -6.4(6)   |
| O(4)-C(3)-C(4)-F(6)    | -84.2(5)  | C(21)-N(3)-C(17)-C(18)  | -0.9(7)   |
| O(3)-C(3)-C(4)-F(6)    | 94.7(4)   | Pd(2)-N(3)-C(17)-C(18)  | 174.6(4)  |
| C(9)-N(1)-C(5)-F(7)    | -179.3(4) | N(3)-C(17)-C(18)-C(19)  | 0.0(8)    |
| Pd(1)-N(1)-C(5)-F(7)   | 0.3(5)    | F(12)-C(17)-C(18)-C(19) | -179.1(4) |
| C(9)-N(1)-C(5)-C(6)    | -0.4(6)   | C(17)-C(18)-C(19)-C(20) | 1.3(8)    |
| Pd(1)-N(1)-C(5)-C(6)   | 179.1(3)  | C(18)-C(19)-C(20)-C(21) | -1.6(8)   |
| N(1)-C(5)-C(6)-C(7)    | 0.0(7)    | C(17)-N(3)-C(21)-C(20)  | 0.6(7)    |
| F(7)-C(5)-C(6)-C(7)    | 178.8(4)  | Pd(2)-N(3)-C(21)-C(20)  | -175.0(4) |
| C(5)-C(6)-C(7)-C(8)    | 0.4(6)    | C(19)-C(20)-C(21)-N(3)  | 0.6(8)    |
| C(6)-C(7)-C(8)-C(9)    | -0.4(7)   |                         |           |
| C(5)-N(1)-C(9)-C(8)    | 0.4(6)    |                         |           |
| Pd(1)-N(1)-C(9)-C(8)   | -179.1(3) |                         |           |
| C(7)-C(8)-C(9)-N(1)    | 0.0(7)    |                         |           |
| C(14)-N(2)-C(10)-F(8)  | -177.9(4) |                         |           |
| Pd(1)-N(2)-C(10)-F(8)  | 0.9(5)    |                         |           |
| C(14)-N(2)-C(10)-C(11) | 1.6(7)    |                         |           |
| Pd(1)-N(2)-C(10)-C(11) | -179.6(4) |                         |           |

---

Symmetry transformations used to generate equivalent atoms:

#1  $-x, -y+1, -z$
